# Supplementary material for: MiSTIC, an integrated platform for the analysis of heterogeneity in large tumour transcriptome datasets
Source: PubMed Central journal article supplement — Nucleic Acids Res. 2017 May 4;45(13):e122. doi: 10.1093/nar/gkx338 (PMC5570030; doi:10.1093/nar/gkx338), 2017-05-04
Supplement: gkx338_supp.pdf [file gkx338_supp.pdf]

## SUPPLEMENTARY FIGURE LEGENDS

### Figure S1: Icicle representation and analysis in MiSTIC

A) MiSTIC Introductory web page. The main menu of MiSTIC is presented at the top in bold with 3 tabs for access to the “Datasets and Icicle” view, to “Single gene correlation analysis” (waterfall format) and to “Pair-wise correlation scatterplots”. The list of datasets available on the server can be sorted or filtered in the Datasets and Icicle view to identify the appropriate dataset to visualize. Each row corresponds to a dataset available on the MiSTIC server. The first four columns (dataset, tissue, project and technology) are name tags for which the key is displayed as column header. Columns can be reordered, sorted and each one can be used for reordering datasets alphabetically (here, the project tags were used). The search box dynamically limits the dataset presented in this view by filtering on all tags. ‘n’ indicates the number of samples used for each dataset and the ‘icicle’ link leads to the icicle page (blue arrow). B) Basic icicle view visualizing the correlation peaks in the selected dataset. By clicking on individual grey grid circles, the corresponding threshold(s) can be indicated with bold lines for easier reference. Enrichment in a specific gene set can be mapped onto the icicle by entering the appropriate type, category, and geneset terms in the search boxes in the geneset enrichment tool (red arrow). C) A specific gene can be located in the cluster with which it correlates most using the “Locate” tool (red arrow). The corresponding peak or layer appears in red in the icicle representation. D) Selection of another dataset in the “Dataset comparison” tool (red arrow) superimposes a colour-coded conservation score onto each cluster; the scale ranges from light blue (for the least conserved clusters) to dark blue (for the most conserved ones). The Kappa coefficient associated with each cluster appears when holding the cursor on this cluster.

### Figure S2: Gene correlation analysis in MiSTIC

A) Clusters of co-expressed genes correspond to sub-graphs of the minimum spanning tree and can be viewed in a graph form with edges representing the optimal pair-wise correlation between genes (nodes); a table of enriched gene sets is shown at the upper right side of the screen). P values (Fisher's exact test) and odds ratios are provided for each gene set, as well as its name, type category and ID. Upon selection of a gene set, pertinent genes in the cluster are highlighted in orange with a list at the top of the graph in orange letters (selection). Alternatively, individual genes can be iteratively selected by clicking on the corresponding tags in the graph, providing links to different databases (lower right side of the screen) for the last selection. Clicking on the Scatterplot tab generates scatterplots for each pair of selected genes (blue arrow) B) Pair-wise scatterplots are presented in a table format with gene names shown on the diagonal. Each scatter plot represents the relation between expression levels of the two corresponding genes in all patient samples of the current data set. Scales are logarithmic and use untransformed data, with all values below 0.0105 being replaced by 0.01. Samples can be highlighted by clicking on any dot or using the gating tool (which displays the proportion of samples in the selection). Specimen identifiers are shown at the bottom of the screen in plain text (HTML) to allow simple export of these selections using copy/paste. Samples can also be highlighted by selection of a clinical feature (“*Select a characteristic*” menu). A sample selection can be saved by clicking on the + sign in the “*Highlight groups*” tool box (blue arrow). Enrichment in clinical characteristics appears in the “*Sample term enrichment*” tab (red arrow). C) The sample selection saved in the first group appears in orange by default. The color can be modified by clicking on the colored dot in the “*Highlight groups*” tool box (red arrow), and a name can be attributed to the sample selection (Group 1 by default). Groups of samples can be removed from this selection by clicking on the – sign.

The selection can be removed using the trash icon. Finally, the samples in the selection can be highlighted in green by clicking on the arrow. New groups can be added to track simultaneously several groups of samples (see examples in **Fig 7** and Figs **S6C&8C**) D) in the “**Single gene correlations**” display (red arrow), both dataset and query gene are selected from the menu (“**Dataset**” and “**Gene**” tabs). The most correlated or anticorrelated genes (10 by default, but the number of labels to display can be increased in the “**More options**” menu) are shown in a waterfall display. Enrichment in selected gene sets (“**Gene set tab**”) is visualised by blue ticks on the X axis of the graph.

**Figure S3: Comparing gene expression clusters in cancer and/or normal tissues with MiSTIC.**

A) Leucegene AML (dataset 1, **Table S1**) icicle highlighted for conservation with CD34+ cells (dataset 5, **Table S1**). B) TCGA breast cancer (dataset 7, **Table S1**) icicle highlighted for conservation with colon cancer (dataset 24, **Table S1**).

**Figure S4: The AML HOXA/B cluster includes transcription factors PBX and Meis1**

A) Minimum spanning tree representation of the *HOXA-MEIS-PBX* cluster from the NK-AML dataset (#4, **Table S1**). B-C) Waterfall representation of genes correlated to *MEIS1* in leukemia (dataset #4, **Table S1**) (B) and in lung cancer from TCGA (dataset #23, **Table S1**) (C).

**Figure S5: Use of the Toggle label option for improved visualization of the correlation graph structure.**

The cell cycle cluster in the TCGA breast cancer dataset is visualized with (A) or without (B) labels.

**Figure S6: TP63 and FOXC1 correlation clusters enriched in the PAM50 gene set.**

Genes present in the correlation peaks containing *TP63* and *FOXC1* are shown.

**Figure S7: Use of the Locate gene set tool for visualization of the genes in a set.**

Genes in the PAM50 (A) or Oncotype Dx (B) gene sets are visualized on the TCGA breast cancer icicle, revealing genes in these signatures that are found in different correlation peaks or in large clusters of less correlated genes.

**Figure S8: Analysis of sample enrichment in the breast cancer dataset**

A-B) Samples in the breast cancer dataset (#7) were ordered according to expression levels of *AURKA* and *CENPA*, which are highly correlated ( $r=0.83$ ). Windows corresponding to low (A) or high (B) expression levels of these genes were manually selected. The sample term enrichment list indicates strong enrichment in PAM50 subtypes LumA and Basal. C) Tumors annotated as LumA, LumB, HER2+ and Basal were selected from the “**Select a characteristic**” list and highlighted in different colors in the “**Highlight groups**” tool-box by adding selected samples with the + tool. Names were attributed to each group by clicking on the colored dot and entering the name in the label box.

**Figure S9: Discrepancies between ER and HER2 levels defined by immunohistochemistry and by mRNA levels.**

A) Breast tumors were sorted according to expression levels of *ESR1* and *ERBB2*, defining four subpopulations, i.e. *ESR1*<sup>hi</sup>*ERBB2*<sup>lo</sup> (orange) *ESR1*<sup>hi</sup>*ERBB2*<sup>hi</sup> (blue) *ESR1*<sup>lo</sup>*ERBB2*<sup>hi</sup> (purple) *ESR1*<sup>lo</sup>*ERBB2*<sup>lo</sup> (dark grey). B-C) ER+ tumors were selected (B) and added to a new highlight group of tumors. *ESR1*<sup>hi</sup> tumor group were then selected and removed from this group to generate an ER+*ESR1*<sup>lo</sup> group of tumors, highlighted in red (C). D) Sorting the ER+*ESR1*<sup>lo</sup> tumors for expression levels of *GREB1* and *ESR1* indicates that these tumors express mostly low levels of *GREB1* in spite of being classified as ER+ tumors. E) Conversely, ER-*ESR1*<sup>hi</sup> tumors were highlighted by selection of ER- tumors and removal of the *ESR1*<sup>lo</sup> groups. F) Expression levels of *GREB1* are high in most ER-*ESR1*<sup>hi</sup> tumors, suggesting active ER signaling. G) HER2+*ERBB2*<sup>lo</sup> tumors were highlighted by selection of HER2+ tumors and removal of the *ERBB2*<sup>hi</sup> group. H) HER2+*ERBB2*<sup>lo</sup> tumors express low levels of *GRB7*.

**Figure S10: Analysis of sample enrichment in the AML Leucegene dataset**

A-B) Samples in the AML Leucegene dataset (#1) were ordered according to expression levels of *AURKA* and *CENPA*, which are highly correlated ( $r=0.87$ ). Windows corresponding to low (A) or high (B) expression levels of these genes were manually selected. The sample term enrichment list indicates strong enrichment in categories Heparinized blood and Bone marrow. C) Tumors annotated as Blood or Bone marrow were selected from the “*Select a characteristic*” list and highlighted in different colors in the “*Highlight groups*” tool-box by adding selected samples with the + tool. This was done in an iterative manner to pool the two Blood or the two Bone marrow categories. Names were added to the group by clicking on the colored dot and entering Blood or Bone marrow in the label box. Characteristic “Disease free survival < 3 yrs” was selected in the “*Select a characteristic*” window, highlighting relevant samples in green.

**Figure S11: Analysis of cell line transcriptome datasets.**

A) Icicle comparison between the CCLE and GNE datasets B) Icicle comparison between the CCLE and breast cancer datasets C) enrichment in the gene set associated with epithelial differentiation in normal breast tissue in a peak of the CCLE dataset. D) *GRHL2* and *RAB25*, two genes of the epithelial differentiation gene set, separate groups of cell lines enriched in hematopoietic-lymphoid origin vs carcinoma annotations in the CCLE dataset. E) Distribution of breast cancer, lung cancer and melanoma cell lines between the two clusters, suggesting mesenchymal characteristics for variable proportions of cell lines for each cancer type in the CCLE dataset.

**Figure S12: Analyzing correlations between miRNAs and protein-coding genes.**

A) Icicle generated from the TCGA breast cancer miRNA dataset (dataset 17 in **Table S1**). Comparison with the TCGA breast normal miRNA dataset (dataset 16 in **Table S1**) is shown. The number of features is lower and fewer peaks are formed compared to protein-coding gene datasets. Enrichment analysis can be performed as above to assess whether miRNA clusters are linked to individual chromosomal loci (whether due to amplification/deletion or to co-localization in miRNA clusters) or coregulated by common TFs. B) Icicle generated from the fusion of the TCGA breast normal datasets for miRNAs and protein-coding genes, resulting in the “BRCA miRNA coding normal” dataset (dataset 19 in **Table S1**). The miRNAs *MIR200A*, *MIR200B*, *MIR200C* and *MIR141* are found in the “Epithelial differentiation” peak (highlighted in blue). C) The waterfall tool indicates high anti-correlations of *MIR200A/B/C* with several genes (highlighted in blue) found in the “mesenchymal/adipocyte differentiation” peak (highlighted in red in B). These miRNAs are known to target *ZEB1/ZEB2* (1, 2), which

are part of this cluster. D) ZEB/AREB6 sites are enriched in the “Epithelial differentiation” gene cluster, consistent with a reciprocal transcriptional/post-transcriptional regulation between genes in these two clusters. Accordingly, reciprocal down-regulation between *GRHL2* and *ZEB1* has recently been described (3), and *MIR200A/B/C* and several “Epithelial differentiation” genes have been shown to be down-regulated by ZEB1/2 (1).

## **SUPPLEMENTARY REFERENCES**

1. Bracken CP, *et al.* (2008) A double-negative feedback loop between ZEB1-SIP1 and the microRNA-200 family regulates epithelial-mesenchymal transition. *Cancer research* 68(19):7846-7854.
2. Diaz-Lopez A, Moreno-Bueno G, & Cano A (2014) Role of microRNA in epithelial to mesenchymal transition and metastasis and clinical perspectives. *Cancer Manag Res* 6:205-216.
3. Cieply B, Farris J, Denvir J, Ford HL, & Frisch SM (2013) Epithelial-mesenchymal transition and tumor suppression are controlled by a reciprocal feedback loop between ZEB1 and Grainyhead-like-2. *Cancer research* 73(20):6299-6309.





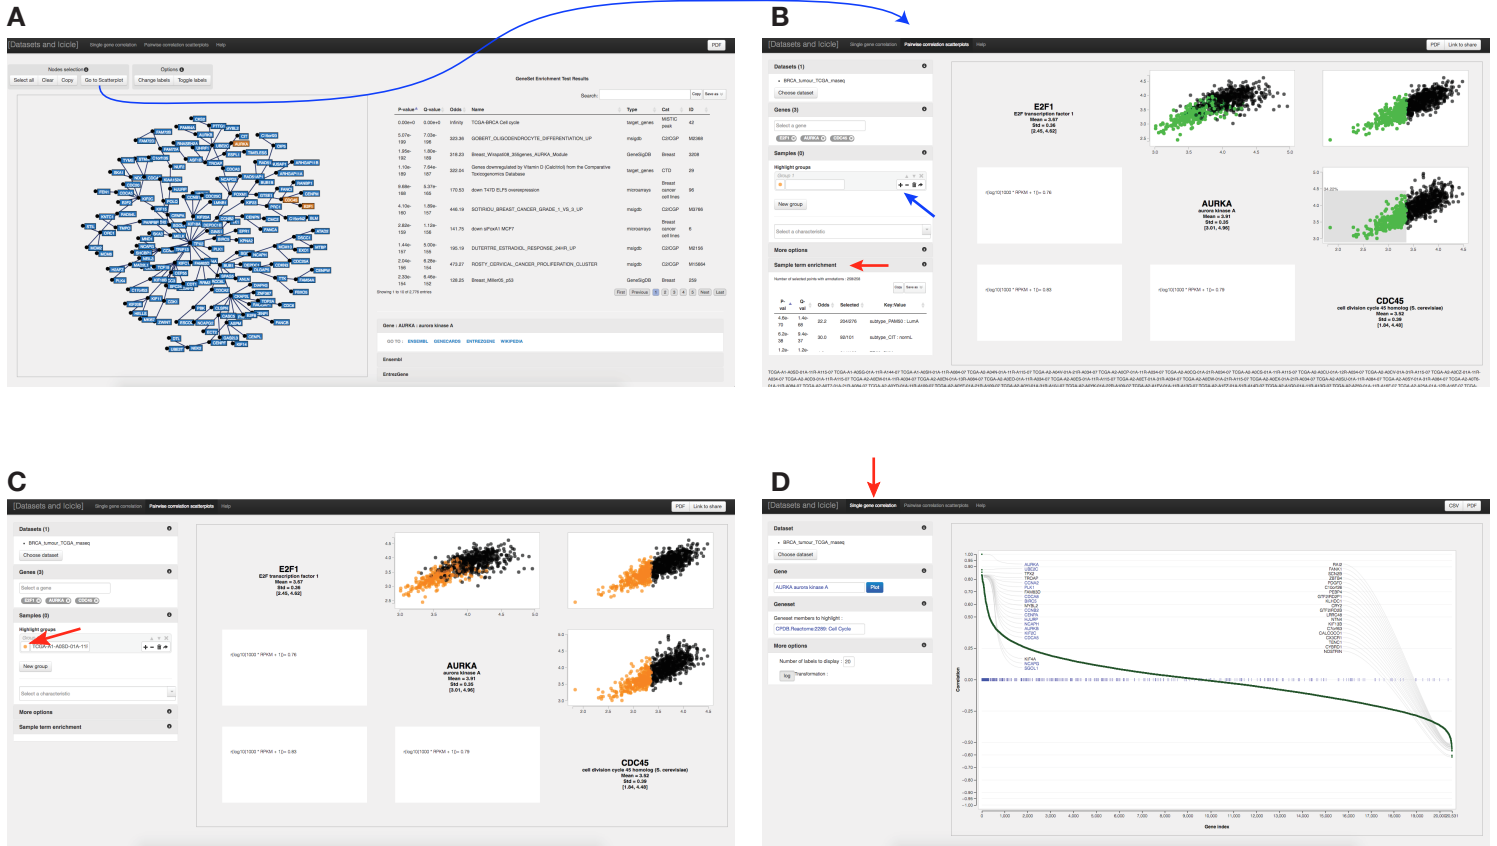

Fig S2

**A**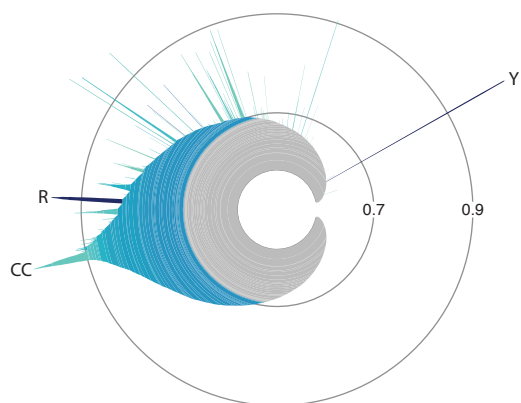

**AML (Leucegene)**  
CD34+, normal (Leucegene)

**B**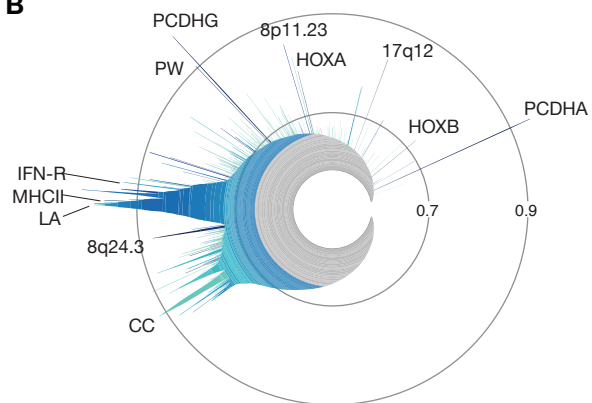

**Breast, tumour (TCGA)**  
Colon, tumour (TCGA)

**Fig S3**

**A**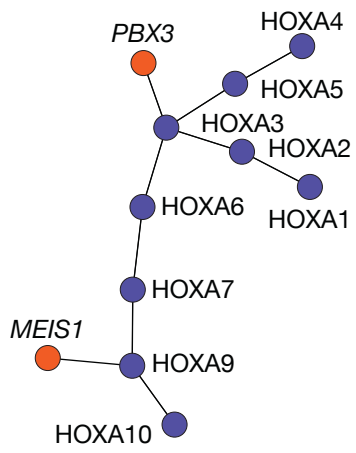**B**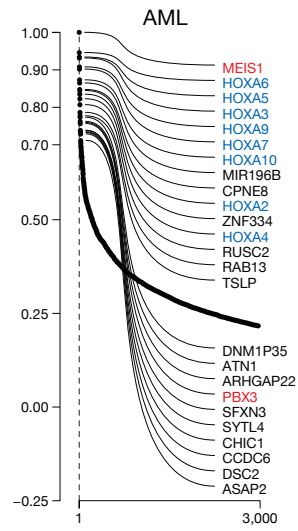**C**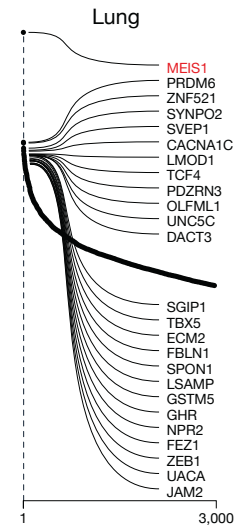**Fig S4**

A

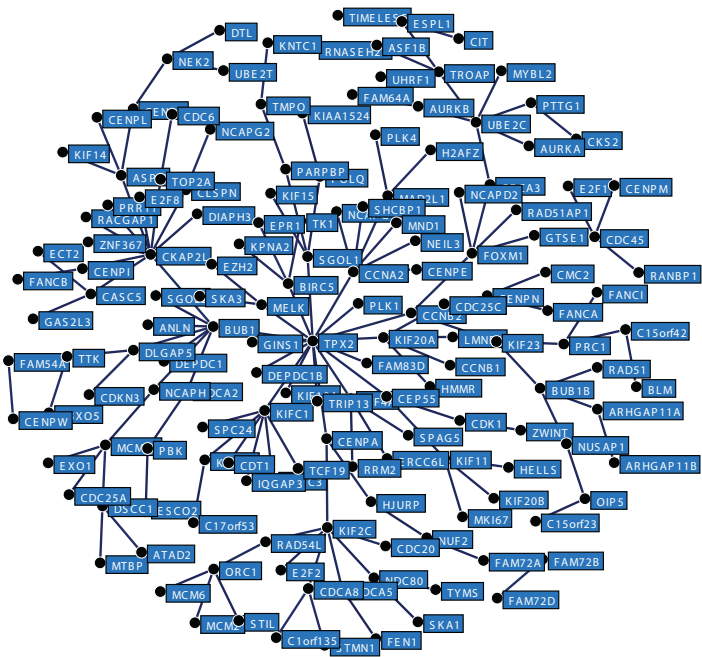

B

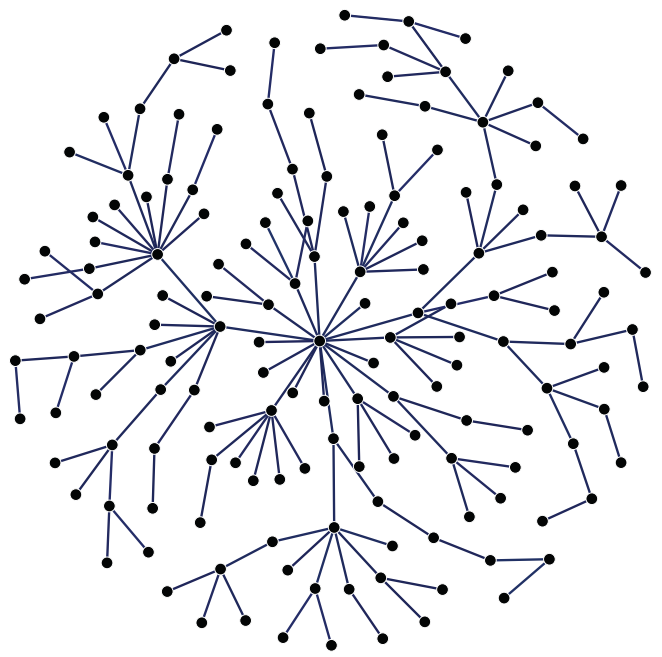

Fig S5

A

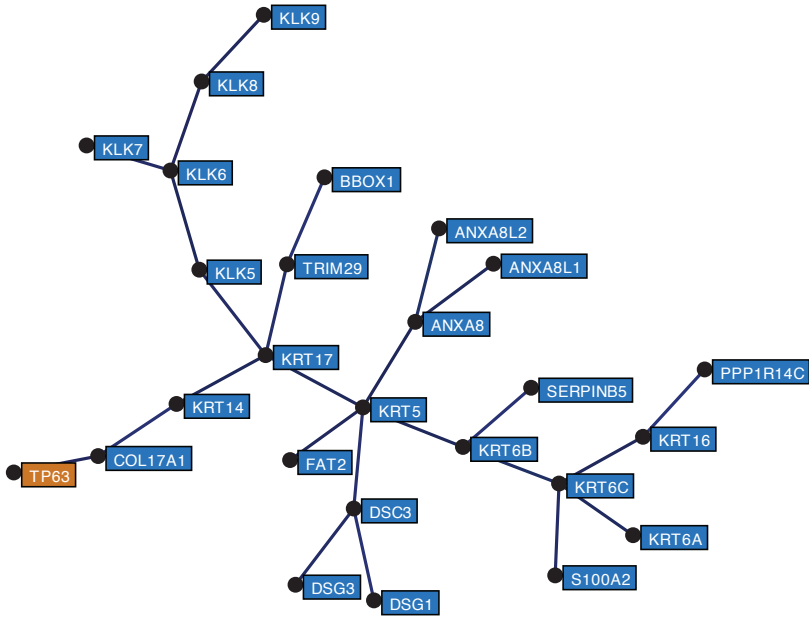

B

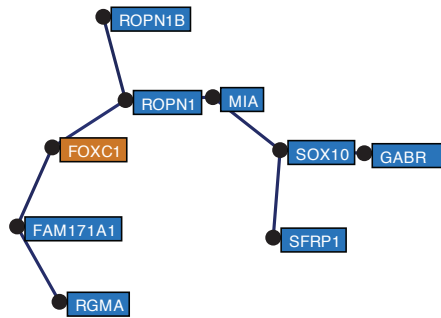

Fig S6

A

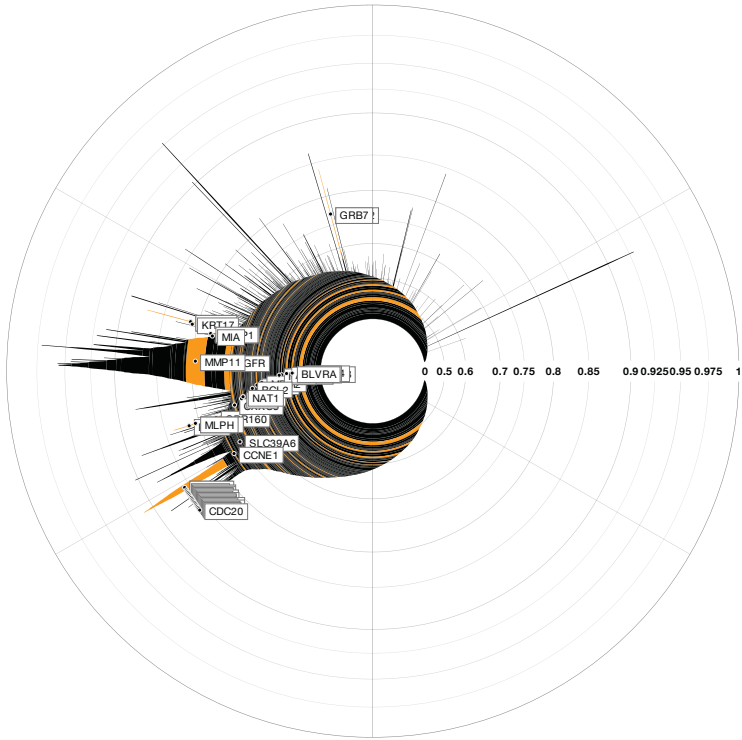

PAM50

B

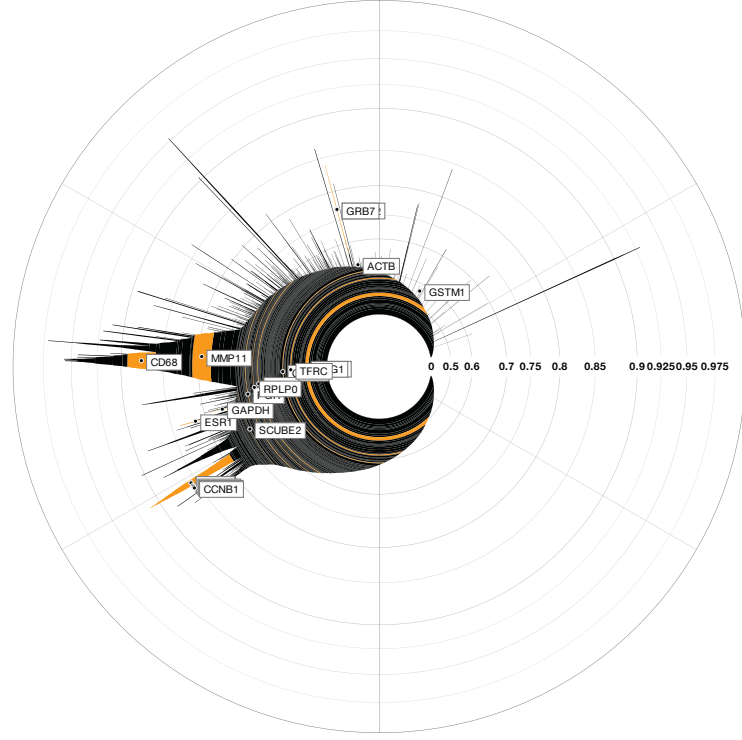

Oncotype Dx

Fig S7

**A**

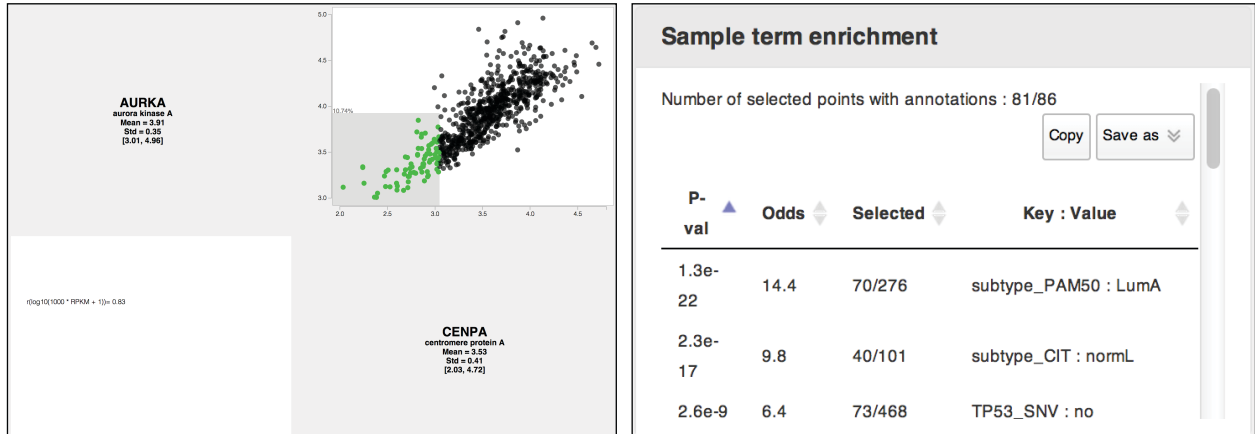

**B**

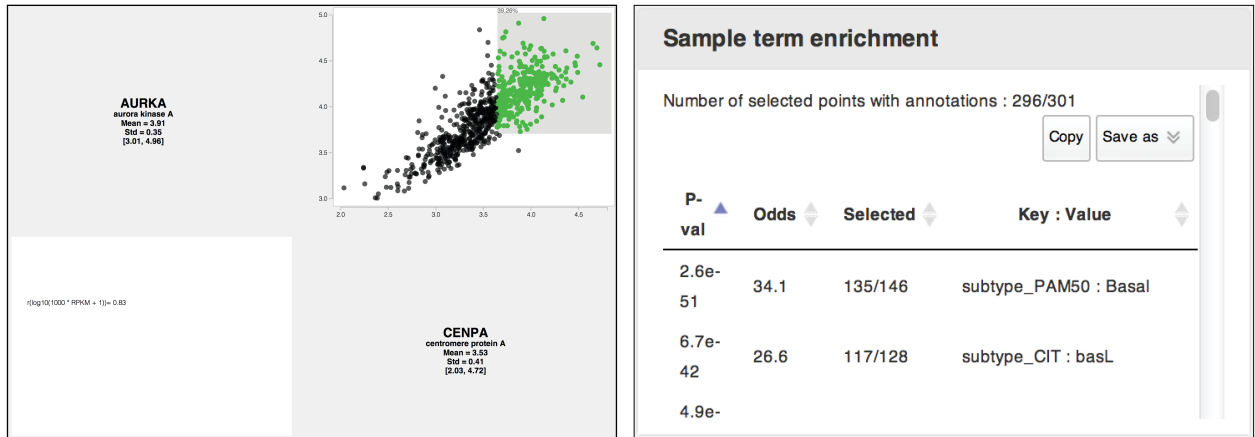

**C**

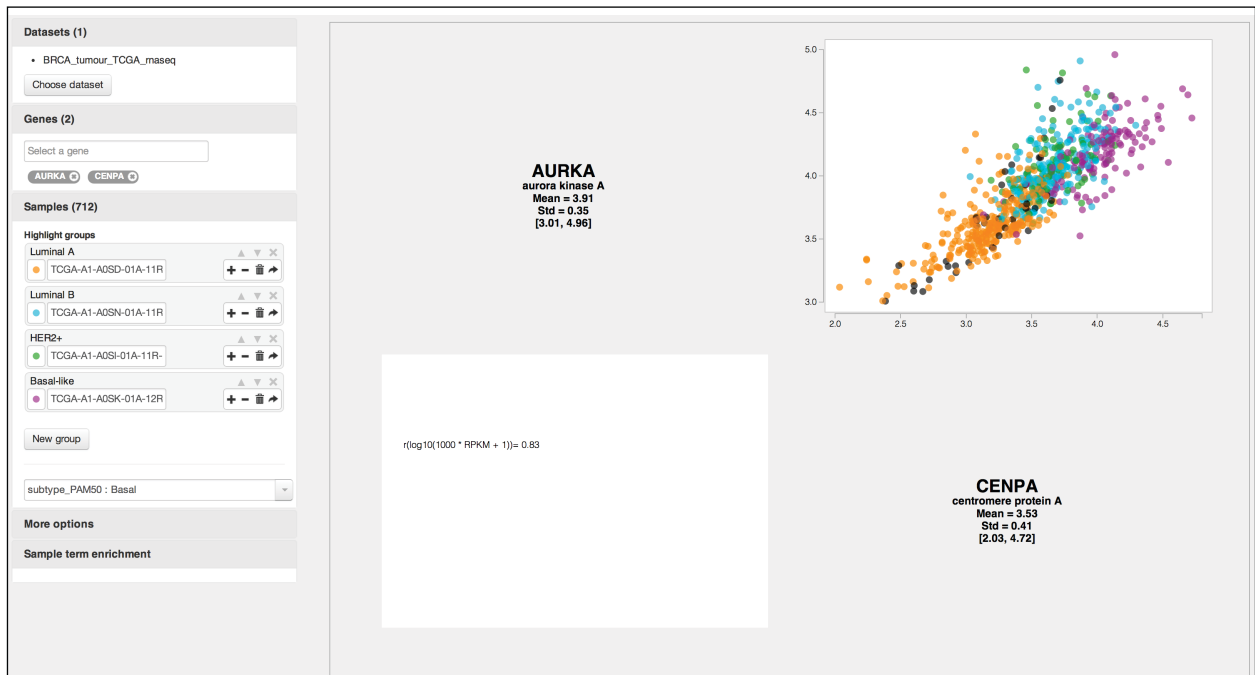

**Fig S8**



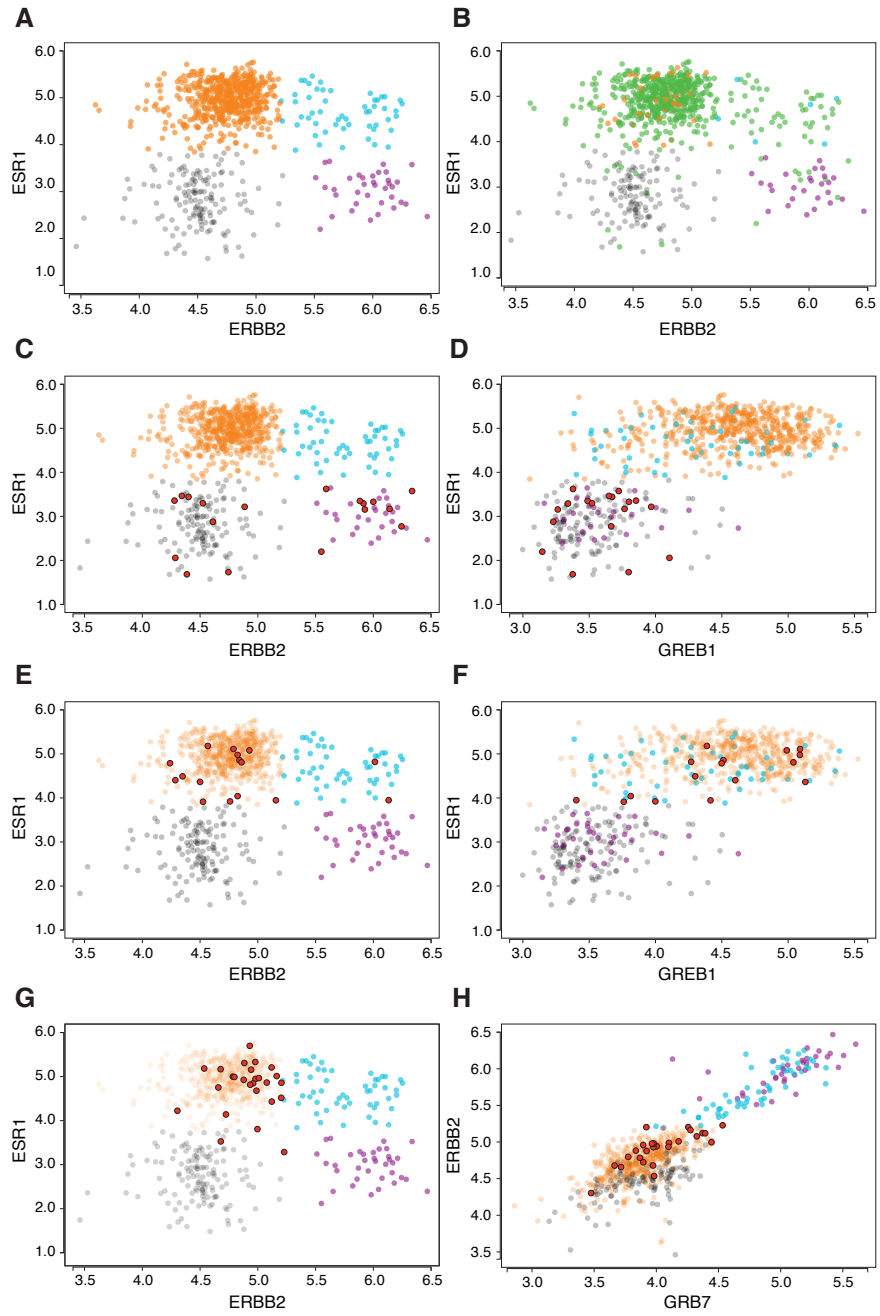

Fig S9

**A**

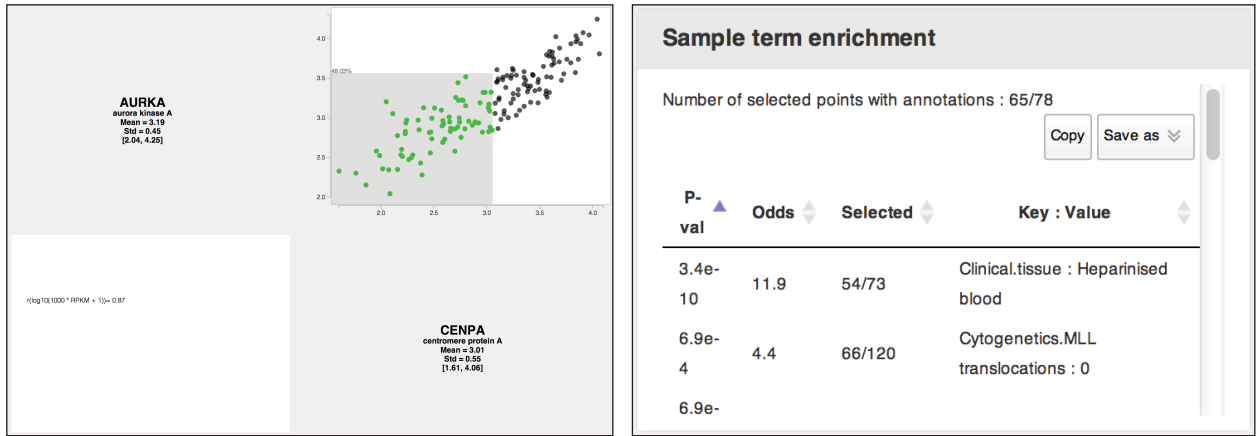

**B**

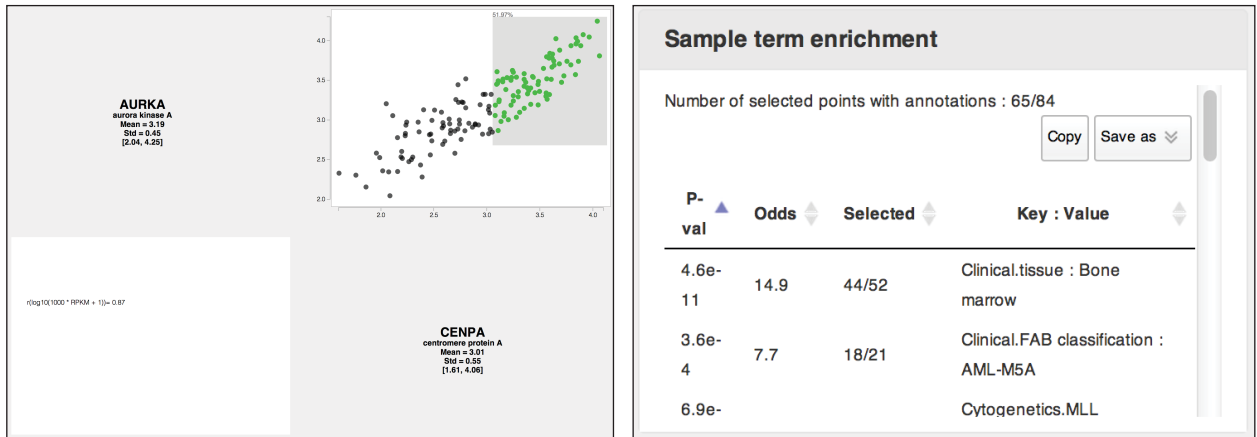

**C**

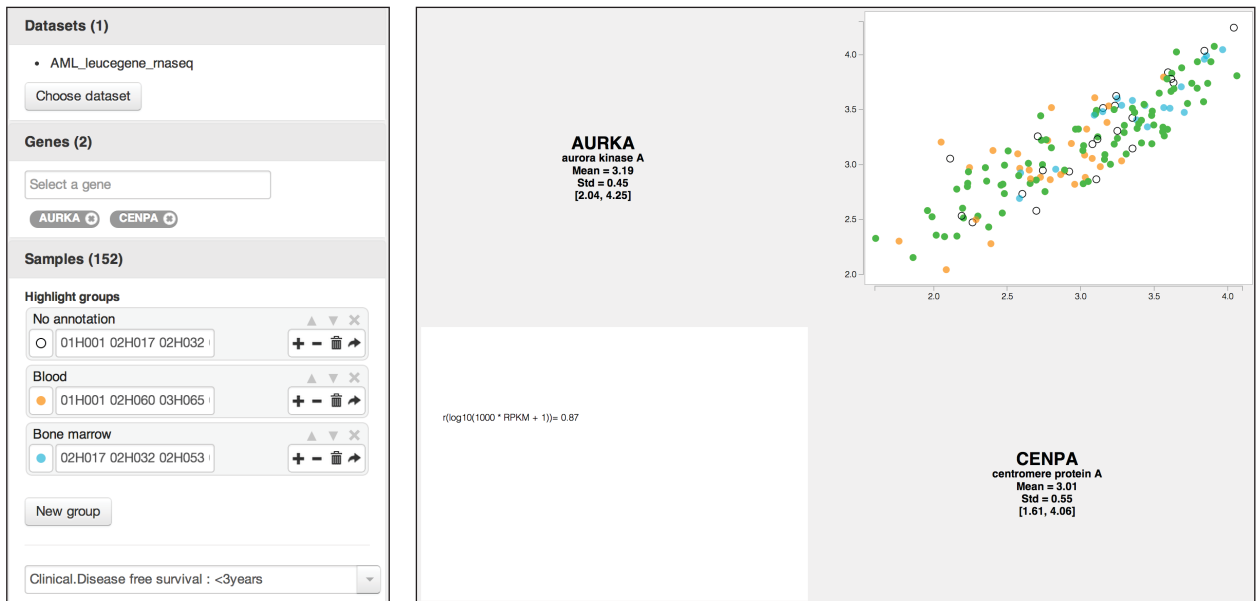

**Fig S10**

**A**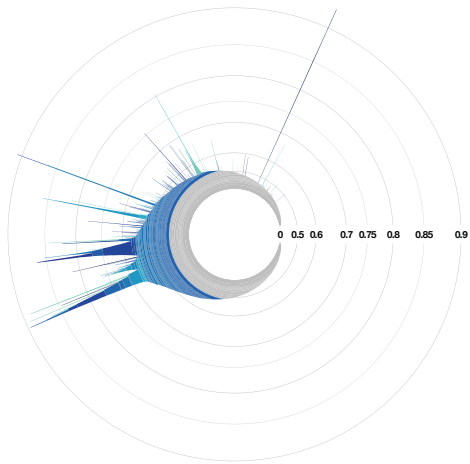

**CCLE**  
GNE

**B**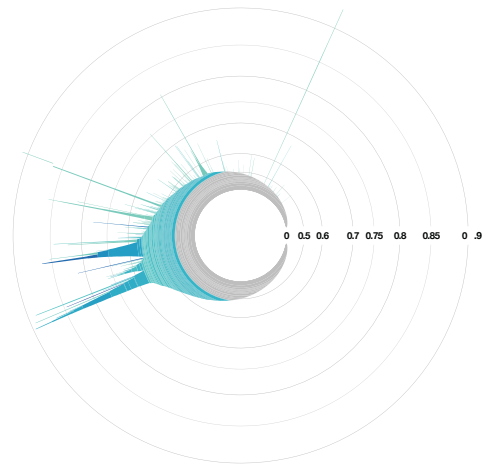

**CCLE**  
Breast, tumour (TCGA)

**C**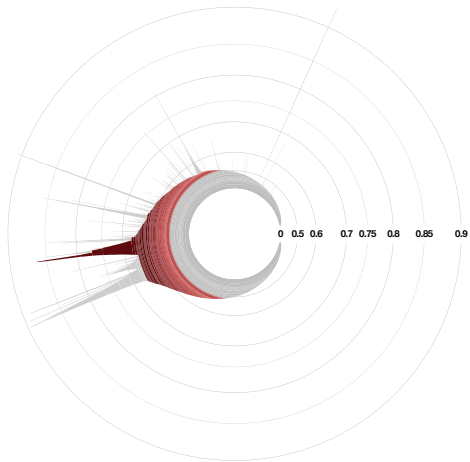**D**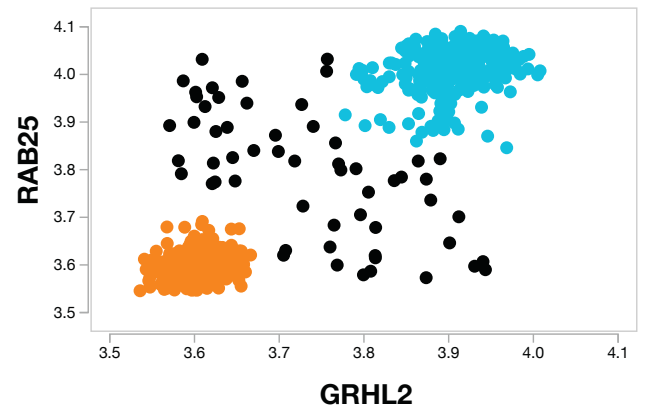**E**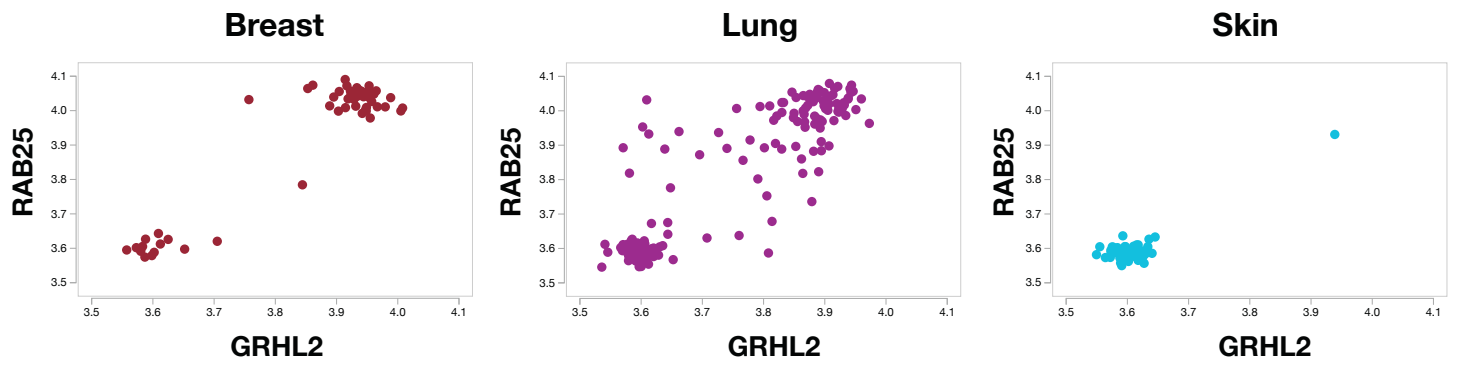

**Fig S11**

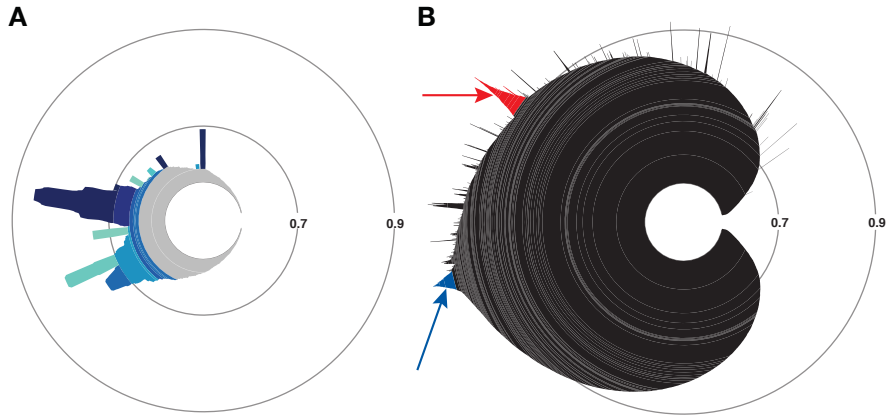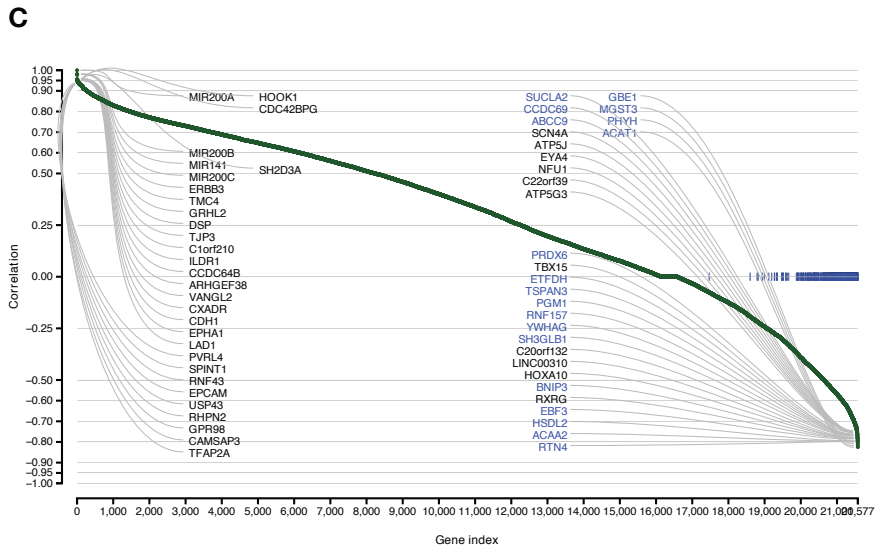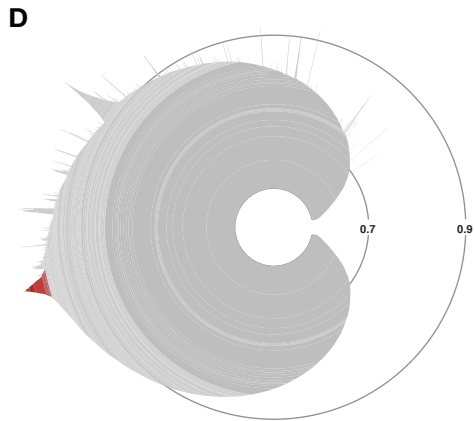

**Fig S12**

Supp Table 1: Lists of datasets

| Project and Dataset names                  | Dataset id | Tissue/Type of Cancer | Sub category          | Source  | Nb. Specimens | Technology | Description                                                                |
|--------------------------------------------|------------|-----------------------|-----------------------|---------|---------------|------------|----------------------------------------------------------------------------|
| AML Leucegene RNASeq                       | 1          | AML                   | Various karyotypes    | BCLQ    | 152           | RNASeq     | Gene Expression Omnibus (GSE49642, GSE52656, GSE62190, GSE67040, GSE67039) |
| AML NK Leucegene RNASeq                    | 2          | AML                   | Normal karyotype      | BCLQ    | 48            | RNASeq     | Gene Expression Omnibus (GSE49642, GSE52656, GSE62190, GSE67040, GSE67039) |
| LAML tumor TCGA RNASeq                     | 3          | AML                   | Various karyotypes    | TCGA    | 179           | RNASeq     | PMID: 23634996                                                             |
| LAML tumor NK TCGA RNASeq                  | 4          | AML                   | Normal karyotype      | TCGA    | 89            | RNASeq     | PMID: 23634996                                                             |
| CD34+/CD34+CD45RA- Leucegene RNASeq        | 5          | Cord blood            | CD34+                 | Héma-Qc | 17            | RNASeq     | Gene Expression Omnibus (GSE48846)                                         |
| BRCA normal TCGA RNASeq                    | 6          | Breast                | Normal                | TCGA    | 102           | RNASeq     | PMID: 23000897                                                             |
| BRCA tumor TCGA RNASeq                     | 7          | Breast                | Cancer                | TCGA    | 754           | RNASeq     | PMID: 23000897                                                             |
| BRCA tumor TCGA RNASeq ER+                 | 8          | Breast                | Cancer - ER+          | TCGA    | 553           | RNASeq     | PMID: 23000897                                                             |
| BRCA tumor TCGA RNASeq ER-                 | 9          | Breast                | Cancer - ER-          | TCGA    | 165           | RNASeq     | PMID: 23000897                                                             |
| BRCA tumor TCGA RNASeq HER2+               | 10         | Breast                | Cancer - HER2+        | TCGA    | 105           | RNASeq     | PMID: 23000897                                                             |
| BRCA tumor TCGA RNASeq HER2-               | 11         | Breast                | Cancer - HER2-        | TCGA    | 606           | RNASeq     | PMID: 23000897                                                             |
| BRCA tumor TCGA RNASeq triple negative     | 12         | Breast                | Cancer - Triple -     | TCGA    | 117           | RNASeq     | PMID: 23000897                                                             |
| BRCA tumor TCGA RNASeq not triple negative | 13         | Breast                | Cancer - Not triple - | TCGA    | 637           | RNASeq     | PMID: 23000897                                                             |
| BRCA tumor TCGA RNASeq luminal A           | 14         | Breast                | Cancer - Luminal A    | TCGA    | 276           | RNASeq     | PMID: 23000897                                                             |
| BRCA tumor TCGA RNASeq luminal B           | 15         | Breast                | Cancer - Luminal B    | TCGA    | 192           | RNASeq     | PMID: 23000897                                                             |
| BRCA miRNA normal                          | 16         | Breast                | Normal                | TCGA    | 87            | RNASeq     | PMID: 23000897                                                             |
| BRCA miRNA tumor                           | 17         | Breast                | Cancer                | TCGA    | 659           | RNASeq     | PMID: 23000897                                                             |
| BRCA miRNA coding normal                   | 18         | Breast                | Normal                | TCGA    | 80            | RNASeq     | PMID: 23000897                                                             |
| BRCA miRNA coding tumor                    | 19         | Breast                | Cancer                | TCGA    | 440           | RNASeq     | PMID: 23000897                                                             |
| KIRC normal TCGA RNASeq                    | 20         | Kidney                | Normal                | TCGA    | 68            | RNASeq     | PMID: 23792563                                                             |
| KIRC tumor TCGA RNASeq                     | 21         | Kidney                | Cancer                | TCGA    | 470           | RNASeq     | PMID: 23792563                                                             |
| LUAD normal TCGA RNASeq                    | 22         | Lung                  | Normal                | TCGA    | 37            | RNASeq     | PMID: 22980975                                                             |
| LUAD tumor TCGA RNASeq                     | 23         | Lung                  | Cancer                | TCGA    | 129           | RNASeq     | PMID: 22980975                                                             |
| COAD tumor TCGA RNASeq                     | 24         | Colon                 | Cancer                | TCGA    | 192           | RNASeq     | PMID: 22810696                                                             |
| CCLE                                       | 25         | Cell lines            | Cancer                | CCLE    | 917           | Affymetrix | PMID: 22460905                                                             |
| GNE_RPKM                                   | 26         | Cell lines            | Cancer                | GDSC    | 675           | RNASeq     | PMID: 25485619                                                             |
| GNE_VSD                                    | 27         | Cell lines            | Cancer                | GDSC    | 675           | RNASeq     | PMID: 25485619                                                             |

Supp. Table 2. Patient annotations.

| BCLQ ID | Exome sequenced (HiSeq) | Transcriptome sequenced (HiSeq) | Chemical screen | DX (WHO)                                  | DX (short) | DX (FAB) | Age | Sex | Karyotype (seq) | Normal karyotype | Blasts (%) | Tissue      | WBC x 10 <sup>9</sup> /L | NPM1 (exon Mut2) | FLT-3-ITD | CD34 (%) | Total reads | Passing filters | Mapped reads | Basepairs | % Mapped reads | Mean Exon RPKM |
|---------|-------------------------|---------------------------------|-----------------|-------------------------------------------|------------|----------|-----|-----|-----------------|------------------|------------|-------------|--------------------------|------------------|-----------|----------|-------------|-----------------|--------------|-----------|----------------|----------------|
| 02H053  | 1                       | 1                               | 0               | AML without maturation                    | AML        | M1       | 60  | M   | 46,XY[20]       | 1                | 96%        | Bone Marrow | 99.0                     | Mut              | Mut       | 0        | 2.54E+08    | 2.44E+08        | 1.66E+08     | 1.38E+10  | 68%            | 19.72          |
| 02H066  | 1                       | 1                               | 0               | AML without maturation                    | AML        | M1       | 53  | F   | 46,XX[22]       | 1                | 95%        | Bone Marrow | 125.0                    | Mut              | Mut       | 2        | 2.02E+08    | 1.90E+08        | 1.38E+08     | 1.10E+10  | 73%            | 18.76          |
| 03H041  | 1                       | 1                               | 0               | Acute monoblastic and monocytic leukaemia | AML        | M5       | 47  | F   | 46,XX[22]       | 1                | 83%        | Bone Marrow | 102.0                    | WT               | Mut       | 28       | 1.39E+08    | 1.34E+08        | 9.89E+07     | 8.31E+09  | 74%            | 18.52          |
| 03H116  | 1                       | 1                               | 0               | AML without maturation                    | AML        | M1       | 55  | F   | 46,XX[21]       | 1                | 97%        | Bone Marrow | 120.0                    | Mut              | Mut       | 1        | 2.10E+08    | 2.03E+08        | 1.62E+08     | 1.16E+10  | 80%            | 14.71          |
| 03H119  | 1                       | 1                               | 0               | AML without maturation                    | AML        | M1       | 68  | M   | 46,XY[20]       | 1                | 92%        | Bone Marrow | 6.4                      | WT               | WT        | 98       | 2.40E+08    | 2.27E+08        | 1.70E+08     | 1.35E+10  | 75%            | 17.60          |
| 04H024  | 1                       | 1                               | 0               | AML without maturation                    | AML        | M1       | 45  | F   | 46,XX[21]       | 1                | 76%        | Bone Marrow | 231.0                    | Mut              | WT        | 8        | 2.36E+08    | 2.19E+08        | 1.69E+08     | 1.39E+10  | 77%            | 17.76          |
| 04H112  | 1                       | 1                               | 0               | AML without maturation                    | AML        | M1       | 64  | F   | 46,XX[21]       | 1                | 91%        | Bone Marrow | 361.2                    | Mut              | Mut       | 36       | 3.14E+08    | 2.90E+08        | 2.11E+08     | 1.75E+10  | 73%            | 18.73          |
| 04H133  | 1                       | 1                               | 0               | AML without maturation                    | AML        | M1       | 62  | F   | 46,XX[20]       | 1                | 91%        | Bone Marrow | 60.3                     | Mut              | Mut       | 1        | 2.54E+08    | 2.39E+08        | 1.85E+08     | 1.48E+10  | 77%            | 18.75          |
| 05H050  | 1                       | 1                               | 0               | Acute myelomonocytic leukaemia            | AML        | M4       | 61  | M   | 46,XY[20]       | 1                | 94%        | Bone Marrow | 80.6                     | WT               | Mut       | 10       | 2.44E+08    | 2.13E+08        | 1.62E+08     | 1.31E+10  | 76%            | 18.09          |
| 05H094  | 1                       | 1                               | 0               | Acute monoblastic and monocytic leukaemia | AML        | M5B      | 35  | M   | 46,XY[23]       | 1                | 94%        | Bone Marrow | 68.4                     | Mut              | WT        | 24       | 2.41E+07    | 2.25E+07        | 1.61E+07     | 1.19E+09  | 72%            | 15.49          |
| 05H149  | 1                       | 1                               | 0               | AML without maturation                    | AML        | M1       | 55  | M   | 46,XY[20]       | 1                | 80%        | Blood       | 30.5                     | WT               | WT        | 98       | 1.35E+08    | 1.17E+08        | 8.95E+07     | 6.36E+09  | 76%            | 15.38          |
| 05H163  | 1                       | 1                               | 0               | AML without maturation                    | AML        | M1       | 20  | M   | 46,XY[22]       | 1                | 86%        | Blood       | 136.0                    | WT               | WT        | 96       | 1.31E+08    | 1.29E+08        | 1.03E+08     | 7.46E+09  | 80%            | 15.77          |
| 05H181  | 1                       | 1                               | 0               | Acute monoblastic and monocytic leukaemia | AML        | M5B      | 65  | F   | 46,XX[11]       | 1                | 80%        | Blood       | 77.3                     | Mut              | Mut       | 2        | 1.57E+08    | 1.51E+08        | 1.16E+08     | 9.39E+09  | 78%            | 16.78          |
| 06H028  | 1                       | 1                               | 0               | AML without maturation                    | AML        | M1       | 70  | F   | 46,XX[20]       | 1                | 95%        | Bone Marrow | 258.8                    | Mut              | WT        | 2        | 2.40E+08    | 2.32E+08        | 1.92E+08     | 1.27E+10  | 83%            | 13.40          |
| 06H045  | 1                       | 1                               | 1               | AML with maturation                       | AML        | M2       | 30  | F   | 46,XX[22]       | 1                | 70%        | Bone Marrow | 16.6                     | WT               | WT        | 70       | 9.58E+07    | 9.41E+07        | 6.89E+07     | 5.07E+09  | 73%            | 15.74          |
| 06H144  | 1                       | 1                               | 0               | AML without maturation                    | AML        | M1       | 71  | F   | 46,XX[20]       | 1                | 90%        | Blood       | 56.1                     | Mut              | WT        | 2        | 2.75E+08    | 2.62E+08        | 2.09E+08     | 1.34E+10  | 80%            | 11.95          |
| 07H042  | 1                       | 1                               | 1               | Acute myeloid leukaemia, NOS              | AML        | NC       | 23  | M   | 46,XY[20]       | 1                | 83%        | Blood       | 69.0                     | Mut              | Mut       | 7        | 1.40E+08    | 1.37E+08        | 1.06E+08     | 7.88E+09  | 77%            | 16.67          |
| 07H062  | 1                       | 1                               | 0               | AML without maturation                    | AML        | M1       | 58  | M   | 46,XY[20]       | 1                | 90%        | Blood       | 105.0                    | Mut              | Mut       | 28       | 1.53E+08    | 1.51E+08        | 1.22E+08     | 8.82E+09  | 81%            | 16.51          |
| 07H135  | 1                       | 1                               | 0               | AML without maturation                    | AML        | M1       | 67  | M   | 46,XY[20]       | 1                | 97%        | Blood       | 106.7                    | Mut              | Mut       | 2        | 2.38E+08    | 2.24E+08        | 1.79E+08     | 1.32E+10  | 80%            | 15.91          |
| 08H048  | 1                       | 1                               | 1               | AML without maturation                    | AML        | M1       | 45  | M   | 46,XY[21]       | 1                | 96%        | Blood       | 127.7                    | WT               | WT        | 41       | 2.20E+08    | 2.14E+08        | 1.59E+08     | 1.32E+10  | 74%            | 18.28          |
| 08H112  | 1                       | 1                               | 1               | AML with myelodysplasia-related changes   | AML        | NC       | 52  | M   | 46,XY[20]       | 1                | 85%        | Blood       | 28.3                     | WT               | WT        | 91       | 2.46E+08    | 2.31E+08        | 1.65E+08     | 1.23E+10  | 72%            | 16.98          |
| 09H031  | 1                       | 1                               | 1               | AML without maturation                    | AML        | M1       | 54  | F   | 46,XX[20]       | 1                | 85%        | Blood       | 48.9                     | Mut              | Mut       | 10       | 2.39E+08    | 2.32E+08        | 1.65E+08     | 1.31E+10  | 71%            | 17.83          |
| 09H043  | 1                       | 1                               | 0               | AML without maturation                    | AML        | M1       | 53  | M   | 46,XY[21]       | 1                | 80%        | Bone Marrow | 33.2                     | Mut              | Mut       | 8        | 2.00E+08    | 1.91E+08        | 1.49E+08     | 1.16E+10  | 78%            | 17.48          |
| 09H083  | 1                       | 1                               | 0               | AML without maturation                    | AML        | M1       | 63  | F   | 46,XX[20]       | 1                | 94%        | Blood       | 65.3                     | Mut              | Mut       | 5        | 2.73E+08    | 2.56E+08        | 2.10E+08     | 1.21E+10  | 82%            | 13.76          |
| 09H111  | 1                       | 1                               | 0               | Acute monoblastic and monocytic leukaemia | AML        | M5B      | 59  | F   | 46,XX[21]       | 1                | 80%        | Blood       | 46.8                     | Mut              | WT        | 2        | 1.98E+08    | 1.90E+08        | 1.54E+08     | 1.22E+10  | 81%            | 16.14          |
| 09H113  | 1                       | 1                               | 1               | AML without maturation                    | AML        | M1       | 56  | M   | 46,XY[22]       | 1                | 95%        | Bone Marrow | 68.7                     | WT               | WT        | 96       | 2.02E+08    | 1.91E+08        | 1.54E+08     | 9.47E+09  | 81%            | 14.54          |
| 09H115  | 1                       | 1                               | 0               | AML without maturation                    | AML        | M1       | 46  | M   | 46,XY[24]       | 1                | 90%        | Blood       | 101.0                    | WT               | Mut       | 3        | 1.78E+08    | 1.72E+08        | 1.40E+08     | 8.84E+09  | 82%            | 15.00          |
| 10H031  | 1                       | 1                               | 0               | Acute monoblastic and monocytic leukaemia | AML        | M5B      | 25  | F   | 46,XX[27]       | 1                | 73%        | Blood       | 184.6                    | WT               | WT        | 47       | 2.94E+08    | 2.77E+08        | 2.28E+08     | 1.60E+10  | 82%            | 14.51          |
| 10H038  | 1                       | 1                               | 0               | AML with minimal differentiation          | AML        | M0       | 67  | F   | 46,XX[20]       | 1                | 91%        | Blood       | 147.8                    | WT               | WT        | 99       | 2.78E+08    | 2.61E+08        | 2.04E+08     | 1.28E+10  | 78%            | 13.98          |
| 10H052  | 1                       | 1                               | 0               | Acute myeloid leukaemia, NOS              | AML        | NC       | 60  | F   | 46,XX[20]       | 1                | 66%        | Blood       | 6.6                      | Mut              | Mut       | 2        | 2.46E+08    | 2.35E+08        | 1.56E+08     | 1.04E+10  | 67%            | 15.41          |
| 10H056  | 1                       | 1                               | 0               | AML without maturation                    | AML        | M1       | 57  | F   | 46,XX[18]       | 1                | 83%        | Bone Marrow | 6.3                      | WT               | WT        | 97       | 1.49E+08    | 1.45E+08        | 1.10E+08     | 8.34E+09  | 76%            | 20.04          |
| 10H072  | 1                       | 1                               | 0               | Acute monoblastic and monocytic leukaemia | AML        | M5B      | 69  | M   | 46,XY[20]       | 1                | 77%        | Bone Marrow | 23.5                     | Mut              | WT        | 1        | 2.00E+08    | 1.92E+08        | 1.61E+08     | 1.08E+10  | 84%            | 15.71          |
| 10H089  | 1                       | 1                               | 0               | Acute myeloid leukaemia, NOS              | AML        | NC       | 49  | F   | 46,XX[26]       | 1                | 80%        | Blood       | 4.0                      | WT               | WT        | 11       | 3.45E+08    | 3.32E+08        | 2.53E+08     | 1.62E+10  | 76%            | 14.41          |
| 10H092  | 1                       | 1                               | 0               | AML without maturation                    | AML        | M1       | 69  | F   | 46,XX[21]       | 1                | 90%        | Bone Marrow | 72.9                     | Mut              | Mut       | 0        | 1.32E+08    | 1.11E+08        | 8.65E+07     | 6.37E+09  | 78%            | 16.14          |
| 10H095  | 1                       | 1                               | 0               | AML without maturation                    | AML        | M1       | 65  | F   | 46,XX[24]       | 1                | 91%        | Blood       | 52.0                     | Mut              | Mut       | 0        | 1.08E+08    | 1.00E+08        | 8.09E+07     | 5.47E+09  | 81%            | 13.64          |
| 10H101  | 1                       | 1                               | 0               | AML with myelodysplasia-related changes   | AML        | M1       | 49  | F   | 46,XX[22]       | 1                | 70%        | Bone Marrow | 24.5                     | Mut              | Mut       | 1        | 1.87E+08    | 1.80E+08        | 1.42E+08     | 8.53E+09  | 79%            | 15.06          |
| 10H115  | 1                       | 1                               | 0               | AML without maturation                    | AML        | M1       | 43  | M   | 46,XY[23]       | 1                | 88%        | Bone Marrow | 21.6                     | Mut              | Mut       | 0        | 2.33E+08    | 2.22E+08        | 1.76E+08     | 1.06E+10  | 79%            | 14.41          |
| 10H166  | 1                       | 1                               | 0               | Acute myelomonocytic leukaemia            | AML        | M4       | 63  | M   | 46,XY[20]       | 1                | 89%        | Blood       | 226.2                    | Mut              | Mut       | 1        | 4.73E+07    | 4.51E+07        | 3.61E+07     | 2.62E+09  | 80%            | 15.57          |
| 11H006  | 1                       | 1                               | 0               | Acute monoblastic and monocytic leukaemia | AML        | M5A      | 26  | F   | 46,XX[23]       | 1                | 94%        | Bone Marrow | 33.0                     | Mut              | WT        | 1        | 1.97E+08    | 1.66E+08        | 1.36E+08     | 1.09E+10  | 82%            | 17.39          |
| 11H009  | 1                       | 1                               | 0               | AML with maturation                       | AML        | M2       | 53  | M   | 46,XY[20]       | 1                | 70%        | Blood       | 17.6                     | WT               | Mut       | 6        | 1.26E+08    | 1.22E+08        | 9.75E+07     | 5.78E+09  | 80%            | 14.50          |
| 11H021  | 1                       | 1                               | 0               | AML with maturation                       | AML        | M2       | 21  | F   | 46,XX[20]       | 1                | 70%        | Blood       | 23.1                     | WT               | Mut       | 97       | 9.90E+07    | 9.30E+07        | 7.20E+07     | 4.99E+09  | 77%            | 15.03          |
| 11H058  | 0                       | 1                               | 0               | AML without maturation                    | AML        | M1       | 58  | M   | 46,XY[20]       | 1                | 90%        | Bone Marrow | 1.6                      | Mut              | Mut       | 1        | 2.13E+08    | 2.07E+08        | 1.59E+08     | 1.23E+10  | 77%            | 17.48          |
| 11H072  | 1                       | 1                               | 0               | AML with maturation                       | AML        | M2       | 52  | F   | 46,XX[20]       | 1                | 80%        | Blood       | 32.2                     | Mut              | Mut       | 0        | 1.54E+08    | 1.47E+08        | 1.16E+08     | 7.69E+09  | 79%            | 14.50          |
| 11H083  | 1                       | 1                               | 0               | Acute monoblastic and monocytic leukaemia | AML        | M5A      | 52  | M   | 46,XY[20]       | 1                | 80%        | Blood       | 77.1                     | Mut              | Mut       | 0        | 1.48E+08    | 1.41E+08        | 1.09E+08     | 7.83E+09  | 78%            | 15.93          |
| 11H095  | 1                       | 1                               | 0               | Therapy-related myeloid neoplasms         | t-AML      | M5A      | 50  | M   | 46,XY[20]       | 1                | 87%        | Bone Marrow | 1.4                      | WT               | WT        | 0        | 8.47E+07    | 8.03E+07        | 6.40E+07     | 4.99E+09  | 80%            | 17.71          |
| 11H126  | 1                       | 1                               | 0               | Acute monoblastic and monocytic leukaemia | AML        | M5B      | 74  | M   | 46,XY[21]       | 1                | 68%        | Bone Marrow | 12.9                     | Mut              | WT        | 3        | 1.16E+08    | 1.10E+08        | 9.08E+07     | 7.00E+09  | 83%            | 16.14          |
| 11H142  | 1                       | 1                               | 0               | AML without maturation                    | AML        | M1       | 52  | F   | 46,XX[21]       | 1                | 96%        | Blood       | 119.2                    | Mut              | Mut       | 0        | 1.82E+08    | 1.75E+08        | 1.42E+08     | 8.63E+09  | 81%            | 14.50          |
| 11H151  | 1                       | 1                               | 1               | AML without maturation                    | AML        | M1       | 61  | M   | 46,XY[21]       | 1                | 78%        | Blood       | 53.3                     | Mut              | WT        | 5        | 2.40E+08    | 2.33E+08        | 1.77E+08     | 1.30E+10  | 76%            | 15.57          |
| 11H160  | 1                       | 1                               | 0               | Acute myelomonocytic leukaemia            | AML        | M4       | 36  | F   | 46,XX[22]       | 1                | 65%        | Blood       | 84.8                     | WT               | Mut       | 56       | 3.16E+08    | 3.02E+08        | 2.48E+08     | 1.93E+10  | 82%            | 16.44          |
| 12H030  | 1                       | 1                               | 1               | AML with minimal differentiation          | AML        | M0       | 78  | M   | 46,XY[20]       | 1                | 93%        | Blood       | 144.8                    | WT               | WT        | 94       | 2.36E+08    | 2.29E+08        | 1.76E+08     | 1.29E+10  | 77%            | 16.15          |

DX (FAB): NC, Not classifiable by FAB criteria

Supp Table 3

Supplementary Table 3. Genesets used for enrichment analysis in MISTIC

| geneset type | description                                                                                                                                                                     | # genesets | website                                                                                                                                                                                       | version         | main references (PMID)                                                                                      |
|--------------|---------------------------------------------------------------------------------------------------------------------------------------------------------------------------------|------------|-----------------------------------------------------------------------------------------------------------------------------------------------------------------------------------------------|-----------------|-------------------------------------------------------------------------------------------------------------|
| chipseq      | ChIPseq regions within 25kb, 10kb or 5kb of transcription start site of refseq genes and mimA                                                                                   | 291        | <a href="http://www.pazar.info/http://genome.ucsc.edu/ENCODE/">http://www.pazar.info/http://genome.ucsc.edu/ENCODE/</a>                                                                       |                 | 18971253 22955616 23953112 23375374                                                                         |
| Chromosome   | chromosome and cytoband for refseq genes and mimA (UCSC cytoBand, refGene and wgRna annotation tracks)                                                                          | 841        | <a href="http://hgdownload.soe.ucsc.edu/oldenPath/hg19/database/">http://hgdownload.soe.ucsc.edu/oldenPath/hg19/database/</a>                                                                 |                 | 24270787 12700172 15608248 17991681 21527027 21720365 22895193 22980745 22980975 23000897 23622249 23634996 |
| CNV          | TCGA Copy Number Analysis Consensus database integrating human molecular interaction networks (protein-protein, genetic, metabolic, signaling, gene regulatory and drug-target) | 469        | <a href="http://gdac.broadinstitute.org/runs/analyses_2014_01_15/">http://gdac.broadinstitute.org/runs/analyses_2014_01_15/</a>                                                               |                 |                                                                                                             |
| CPDB         | Gene Families / Transcription Factor                                                                                                                                            | 4576       | <a href="http://ConsensusPathDB.org/http://cpdb.molgen.mpg.de/CPDB/">http://ConsensusPathDB.org/http://cpdb.molgen.mpg.de/CPDB/</a>                                                           | 27 (12.08.2013) | 23143270                                                                                                    |
| GeneFamilies | Gene Signature DataBase                                                                                                                                                         | 1383       | <a href="http://www.genenames.org/http://tfclass.bioinf.uni-goettingen.de/tfclass">http://www.genenames.org/http://tfclass.bioinf.uni-goettingen.de/tfclass</a>                               |                 | 23245209 23180794                                                                                           |
| GeneSigDB    | Gene Ontology                                                                                                                                                                   | 3485       | <a href="http://combio.dfci.harvard.edu/genesigdb/">http://combio.dfci.harvard.edu/genesigdb/</a>                                                                                             | 4               | 22110038                                                                                                    |
| GO           | Gene sets extracted from microarray experiments                                                                                                                                 | 12600      | <a href="http://www.geneontology.org/">http://www.geneontology.org/</a>                                                                                                                       |                 | 10802651                                                                                                    |
| microarrays  | miRecords miRNA-target interactions                                                                                                                                             | 85         | <a href="http://mirecords.biolead.org/">http://mirecords.biolead.org/</a>                                                                                                                     | 4               | 18996891                                                                                                    |
| miRNA        | Molecular Signatures Database                                                                                                                                                   | 1257       | <a href="http://www.broadinstitute.org/asea/msigdb/index.jsp">http://www.broadinstitute.org/asea/msigdb/index.jsp</a>                                                                         | 3.1             | 16199517                                                                                                    |
| MSigDB       | Target genes sets                                                                                                                                                               | 8513       | <a href="http://ctdbase.org/http://rulai.cshl.edu/cgi-bin/TRED/tred.cgi?process=searchTFGeneForm">http://ctdbase.org/http://rulai.cshl.edu/cgi-bin/TRED/tred.cgi?process=searchTFGeneForm</a> |                 | 17202159 23093600 20887958                                                                                  |
| Target genes | Transcription factor binding site predictions within 10kb, 5kb or 2.5kb of transcription start site of refseq genes and mimA                                                    | 47         |                                                                                                                                                                                               |                 | 17986456 16381825                                                                                           |
| TFBS         |                                                                                                                                                                                 | 2568       |                                                                                                                                                                                               |                 |                                                                                                             |

## chipseq

| Cat | Name                                     | pmid     |
|-----|------------------------------------------|----------|
| TF  | AR LNCaP cells DHT                       | 18971253 |
| TF  | ARNT LoVo cells                          | 23953112 |
| TF  | ATF3 K562 cells                          | 22955616 |
| TF  | BCL3 K562 cells                          | 22955616 |
| TF  | BCLAF1 K562 cells                        | 22955616 |
| TF  | CBX3 K562 cells                          | 22955616 |
| TF  | CEBPB K562 cells                         | 22955616 |
| TF  | CEBPB MCF7 cells                         | 22955616 |
| TF  | ChIP-chip AR MCF7 cells                  | 23375374 |
| TF  | ChIP-chip SPDEF MCF7 cells               | 23375374 |
| TF  | ChIP-chip XBP1 MCF7 cells                | 23375374 |
| TF  | CREB1 K562 cells                         | 22955616 |
| TF  | CREB1 LoVo cells                         | 23953112 |
| TF  | CREB3L4 LoVo cells                       | 23953112 |
| TF  | CTCF K562 cells                          | 22955616 |
| TF  | CTCF MCF7 cells                          | 22955616 |
| TF  | CTCF K562 cells                          | 22955616 |
| TF  | E2f1 HeLa-S3 cells                       | 22955616 |
| TF  | E2f4 Human mesenchymal stem cells        | 18971253 |
| TF  | E2f6 K562 cells                          | 22955616 |
| TF  | EGR1 K562 cells                          | 22955616 |
| TF  | EGR1 K562 cells PMA                      | 18971253 |
| TF  | EGR1 MCF7 cells                          | 22955616 |
| TF  | ELF1 K562 cells                          | 22955616 |
| TF  | ELF1 MCF7 cells                          | 22955616 |
| TF  | ESR1 LoVo cells                          | 23953112 |
| TF  | ESR1 MCF7 cells E2                       | 18971253 |
| TF  | ETS1 K562 cells                          | 22955616 |
| TF  | ETS1 RWPE-1 cells                        | 18971253 |
| TF  | FOS MCF7 cells E2                        | 21179027 |
| TF  | FOSL1 K562 cells                         | 22955616 |
| TF  | FOSL2 MCF7 cells                         | 22955616 |
| TF  | FOXA1 MCF7 cells E2                      | 18971253 |
| TF  | FOXM1 MCF7 cells                         | 22955616 |
| TF  | GABPA HL60 cells                         | 22955616 |
| TF  | GABPA K562 cells                         | 22955616 |
| TF  | GABPA MCF7 cells                         | 22955616 |
| TF  | GATA2 K562 cells                         | 22955616 |
| TF  | GATA3 MCF7 cells                         | 22955616 |
| TF  | GATA3 MCF7 cells E2                      | 18971253 |
| TF  | GR A549 cells 100nM DEX                  | 22955616 |
| TF  | GRHL2 primary bronchial epithelial cells | 23690579 |
| TF  | HEY1 K562 cells                          | 22955616 |
| TF  | HOUA1 LoVo cells                         | 23953112 |
| TF  | HOUA10 LoVo cells                        | 23953112 |
| TF  | JUND MCF7 cells                          | 22955616 |
| TF  | KLF4 embryonic stem cells                | 18971253 |
| TF  | MAX K562 cells                           | 22955616 |
| TF  | MAX MCF7 cells                           | 22955616 |
| TF  | MCF7 cells RARA                          | 20080953 |
| TF  | MEF2 K562 cells                          | 22955616 |
| TF  | MYB LoVo cells                           | 23953112 |
| TF  | Mybl2 HepG2 cells                        | 22955616 |
| TF  | MYBL2 LoVo cells                         | 23953112 |
| TF  | Nfkb GM12891 cells                       | 22955616 |
| TF  | NFKB2 LoVo cells                         | 23953112 |
| TF  | NKX2.2 LoVo cells                        | 23953112 |
| TF  | NKX31 LNCaP cells                        | 18971253 |
| TF  | NR2F2 K562 cells                         | 22955616 |
| TF  | NR2F2 MCF7 cells                         | 22955616 |
| TF  | NRSF HL60 cells                          | 22955616 |
| TF  | NRSF K562 cells                          | 22955616 |
| TF  | NRSF MCF7 cells                          | 22955616 |
| TF  | PBX1 MCF7 cells                          | 18971253 |
| TF  | PML K562 cells                           | 22955616 |
| TF  | PML MCF7 cells                           | 22955616 |
| TF  | PU.1 HL60 cells                          | 22955616 |
| TF  | PU.1 K562 cells                          | 22955616 |
| TF  | RAD21 K562 cells                         | 22955616 |
| TF  | RAD21 MCF7 cells                         | 22955616 |
| TF  | RARG LoVo cells                          | 23953112 |
| TF  | Rrxr HepG2 cells                         | 22955616 |

Supp Table 3

|    |                     |          |
|----|---------------------|----------|
| TF | SIN3AK20 K562 cells | 22955616 |
| TF | SIN3AK20 MCF7 cells | 22955616 |
| TF | SIX5 K562 cells     | 22955616 |
| TF | SOX2 LoVo cells     | 23953112 |
| TF | SP1 K562 cells      | 22955616 |
| TF | SP2 K562 cells      | 22955616 |
| TF | SPDEF MCF7 cells    | 24043118 |
| TF | SRF K562 cells      | 22955616 |
| TF | SRF MCF7 cells      | 22955616 |
| TF | STAT5A K562 cells   | 22955616 |
| TF | TAF1 K562 cells     | 22955616 |
| TF | TAF1 MCF7 cells     | 22955616 |
| TF | TAF7 K562 cells     | 22955616 |
| TF | TCF12 MCF7 cells    | 22955616 |
| TF | TEAD4 K562 cells    | 22955616 |
| TF | TEAD4 MCF7 cells    | 22955616 |
| TF | TFAP2C MCF7 cells   | 18971253 |
| TF | THAP1 K562 cells    | 22955616 |
| TF | TP53 IMR90 cells    | 18971253 |
| TF | TR4 HepG2 cells     | 22955616 |
| TF | TRIM28 K562 cells   | 22955616 |
| TF | USF1 K562 cells     | 22955616 |
| TF | YY1 K562 cells      | 22955616 |
| TF | ZBTB33 K562 cells   | 22955616 |
| TF | ZBTB7A K562 cells   | 22955616 |

**microarrays**

| Cat                                                                          | Name                                                                    | pmid                        |
|------------------------------------------------------------------------------|-------------------------------------------------------------------------|-----------------------------|
| Breast cancer cell lines                                                     | down MCF7 12h vs 0h E2                                                  | 17013392                    |
| Breast cancer cell lines                                                     | down MCF7 24h E2                                                        | 17986456                    |
| Breast cancer cell lines                                                     | down MCF7 24h E2 CHX                                                    | 17986456                    |
| Breast cancer cell lines                                                     | down MCF7 3h vs 0h E2                                                   | 17013392                    |
| Breast cancer cell lines                                                     | down MCF7 6h vs 0h E2                                                   | 17013392                    |
| Breast cancer cell lines                                                     | down MCF7 CHX RA 8h                                                     | Rozendaal M et al. in prep. |
| Breast cancer cell lines                                                     | down MCF7 RA 8h                                                         | Rozendaal M et al. in prep. |
| Breast cancer cell lines                                                     | down MCF7 TSA 24h                                                       | Ismail H et al. in prep.    |
| Breast cancer cell lines                                                     | down MCF7 TSA 3h                                                        | Ismail H et al. in prep.    |
| Breast cancer cell lines                                                     | down siER1 MCF7                                                         | 22174013                    |
| Breast cancer cell lines                                                     | down siFoxA1 MCF7                                                       | 21151129                    |
| Breast cancer cell lines                                                     | down siFoxA1 MCF7 E2                                                    | 21151129                    |
| Breast cancer cell lines                                                     | down siGATA3 MCF7                                                       | 23172872                    |
| Breast cancer cell lines                                                     | down siGATA3 MCF7 E2                                                    | 23172872                    |
| Breast cancer cell lines                                                     | down SKBR3 CHX RA 8h                                                    | Rozendaal M et al. in prep. |
| Breast cancer cell lines                                                     | down SKBR3 FOXA1 overexpression                                         | Rozendaal M et al. in prep. |
| Breast cancer cell lines                                                     | down SKBR3 FOXO3A overexpression                                        | Rozendaal M et al. in prep. |
| Breast cancer cell lines                                                     | down SKBR3 GATA3 overexpression                                         | Rozendaal M et al. in prep. |
| Breast cancer cell lines                                                     | down SKBR3 Herceptin 24h                                                | Rozendaal M et al. in prep. |
| Breast cancer cell lines                                                     | down SKBR3 RA 24h                                                       | Rozendaal M et al. in prep. |
| Breast cancer cell lines                                                     | down SKBR3 RA 8h                                                        | Rozendaal M et al. in prep. |
| Breast cancer cell lines                                                     | down SKBR3 RA+Herceptin 24h                                             | Rozendaal M et al. in prep. |
| Breast cancer cell lines                                                     | down SKBR3 SOX9                                                         | Rozendaal M et al. in prep. |
| Breast cancer cell lines                                                     | reg MCF7 E2 24h                                                         | 17986456                    |
| Breast cancer cell lines                                                     | reg MCF7 RA 8h                                                          | Rozendaal M et al. in prep. |
| Breast cancer cell lines                                                     | reg SKBR3 RA 8h                                                         | Rozendaal M et al. in prep. |
| Breast cancer cell lines                                                     | up MCF7 12h vs 0h E2                                                    | 17013392                    |
| Breast cancer cell lines                                                     | up MCF7 24h E2                                                          | 17986456                    |
| Breast cancer cell lines                                                     | up MCF7 24h E2 CHX                                                      | 17986456                    |
| Breast cancer cell lines                                                     | up MCF7 3h vs 0h E2                                                     | 17013392                    |
| Breast cancer cell lines                                                     | up MCF7 6h vs 0h E2                                                     | 17013392                    |
| Breast cancer cell lines                                                     | up MCF7 CHX RA 8h                                                       | Rozendaal M et al. in prep. |
| Breast cancer cell lines                                                     | up MCF7 RA 8h                                                           | Rozendaal M et al. in prep. |
| Breast cancer cell lines                                                     | up MCF7 TSA 24h                                                         | Ismail H et al. in prep.    |
| Breast cancer cell lines                                                     | up MCF7 TSA 3h                                                          | Ismail H et al. in prep.    |
| Breast cancer cell lines                                                     | up siER1 MCF7                                                           | 22174013                    |
| Breast cancer cell lines                                                     | up siFoxA1 MCF7                                                         | 21151129                    |
| Breast cancer cell lines                                                     | up siFoxA1 MCF7 E2                                                      | 21151129                    |
| Breast cancer cell lines                                                     | up siGATA3 MCF7                                                         | 23172872                    |
| Breast cancer cell lines                                                     | up siGATA3 MCF7 E2                                                      | 23172872                    |
| Breast cancer cell lines                                                     | up SKBR3 CHX RA 8h                                                      | Rozendaal M et al. in prep. |
| Breast cancer cell lines                                                     | up SKBR3 ELF3 overexpression                                            | Rozendaal M et al. in prep. |
| Breast cancer cell lines                                                     | up SKBR3 FOXA1 overexpression                                           | Rozendaal M et al. in prep. |
| Breast cancer cell lines                                                     | up SKBR3 FOXO3A overexpression                                          | Rozendaal M et al. in prep. |
| Breast cancer cell lines                                                     | up SKBR3 GATA3 overexpression                                           | Rozendaal M et al. in prep. |
| Breast cancer cell lines                                                     | up SKBR3 Herceptin                                                      | Rozendaal M et al. in prep. |
| Breast cancer cell lines                                                     | up SKBR3 RA 24h                                                         | Rozendaal M et al. in prep. |
| Breast cancer cell lines                                                     | up SKBR3 RA 8h                                                          | Rozendaal M et al. in prep. |
| Breast cancer cell lines                                                     | up SKBR3 RA+Herceptin 24h                                               | Rozendaal M et al. in prep. |
| Breast cancer cell lines                                                     | up SOX9 SKBR3 overexpression                                            | Rozendaal M et al. in prep. |
| Breast Cancer Co-Expression module #1 ER: estrogen signaling                 |                                                                         | 24516633                    |
| Breast Cancer Co-Expression module #10 ECM : extracellular matrix            |                                                                         | 24516633                    |
| Breast Cancer Co-Expression module #11 Prolif: cell proliferation            |                                                                         | 24516633                    |
| Breast Cancer Co-Expression module #2 Dev/Basal: development/differentiation |                                                                         | 24516633                    |
| Breast Cancer Co-Expression module #3 Immune                                 |                                                                         | 24516633                    |
| Breast Cancer Co-Expression module #4 Immune                                 |                                                                         | 24516633                    |
| Breast Cancer Co-Expression module #5 Immune                                 |                                                                         | 24516633                    |
| Breast Cancer Co-Expression module #6 Histone                                |                                                                         | 24516633                    |
| Breast Cancer Co-Expression module #7 ERBB2                                  |                                                                         | 24516633                    |
| Breast Cancer Co-Expression module #8 Mixed                                  |                                                                         | 24516633                    |
| Breast Cancer Co-Expression module #9 ECM/Dev/Immune                         |                                                                         | 24516633                    |
| Signature                                                                    | Breast Cancer ENDOPREDICT                                               | 21807638                    |
| Signature                                                                    | Breast Cancer GGI                                                       | 16478745                    |
| Signature                                                                    | Breast Cancer Mammprint                                                 | 11823860                    |
| Signature                                                                    | Breast Cancer molecular subtype [CIT]                                   | 21785460                    |
| Signature                                                                    | Breast Cancer molecular subtype [CIT] - cluster a (basL)                | 21785460                    |
| Signature                                                                    | Breast Cancer molecular subtype [CIT] - cluster b (cycle/proliferation) | 21785460                    |
| Signature                                                                    | Breast Cancer molecular subtype [CIT] - cluster c (lumA)                | 21785460                    |
| Signature                                                                    | Breast Cancer molecular subtype [CIT] - cluster d (AR)                  | 21785460                    |
| Signature                                                                    | Breast Cancer molecular subtype [CIT] - cluster e1 (lumB)               | 21785460                    |



Supp Table 3

|           |                                                                   |          |
|-----------|-------------------------------------------------------------------|----------|
| Signature | Breast Cancer molecular subtype [CIT] - cluster e2 (ESR1)         | 21785460 |
| Signature | Breast Cancer molecular subtype [CIT] - cluster f (lumA/normal)   | 21785460 |
| Signature | Breast Cancer molecular subtype [CIT] - cluster g (mApo)          | 21785460 |
| Signature | Breast Cancer molecular subtype [CIT] - cluster h (normal)        | 21785460 |
| Signature | Breast Cancer molecular subtype [claudin-low vs others]           | 20813035 |
| Signature | Breast Cancer molecular subtype [PAM50]                           | 19204204 |
| Signature | Breast Cancer molecular subtype [TNBC]                            | 21633166 |
| Signature | Breast Cancer molecular subtype [TNBC] - BASAL-LIKE 2 (cluster 3) | 21633166 |
| Signature | Breast Cancer molecular subtype [TNBC] - BASAL-LIKE 1 (cluster 2) | 21633166 |
| Signature | Breast Cancer molecular subtype [TNBC] - IMMUNOMODULATORY (clus   | 21633166 |
| Signature | Breast Cancer molecular subtype [TNBC] - LUMINAL AR (cluster 7)   | 21633166 |
| Signature | Breast Cancer molecular subtype [TNBC] - MESENCHYMAL (cluster 5)  | 21633166 |
| Signature | Breast Cancer molecular subtype [TNBC] - MESENCHYMAL STEM-LIKE (c | 21633166 |
| Signature | Breast Cancer molecular subtype [TNBC] - UNSTABLE (cluster 1)     | 21633166 |
| Signature | Breast Cancer OncotypeDx                                          | 15591335 |

**target genes**

| Cat                                      | Name                                                                   | pmid              |
|------------------------------------------|------------------------------------------------------------------------|-------------------|
| CTD                                      | Genes downregulated by Dihydrotestosterone (DHT) from the Compara      | 23093600          |
| CTD                                      | Genes downregulated by Doxorubicin from the Comparative Toxicogen      | 23093600          |
| CTD                                      | Genes downregulated by estrogen from the Comparative Toxicogenomi      | 23093600          |
| CTD                                      | Genes downregulated by retinoic acid from the Comparative Toxicogen    | 23093600          |
| CTD                                      | Genes downregulated by Tamoxifen from the Comparative Toxicogen        | 23093600          |
| CTD                                      | Genes downregulated by TSA from the Comparative Toxicogenomics D:      | 23093600          |
| CTD                                      | Genes downregulated by Vitamin D (Calcitriol) from the Comparative Tr  | 23093600          |
| CTD                                      | Genes regulated by Dihydrotestosterone (DHT) from the Comparative T    | 23093600          |
| CTD                                      | Genes regulated by Doxorubicin from the Comparative Toxicogenomics     | 23093600          |
| CTD                                      | Genes regulated by estrogen from the Comparative Toxicogenomics Da     | 23093600          |
| CTD                                      | Genes regulated by retinoic acid from the Comparative Toxicogenomics   | 23093600          |
| CTD                                      | Genes regulated by Tamoxifen from the Comparative Toxicogenomics D     | 23093600          |
| CTD                                      | Genes regulated by TSA from the Comparative Toxicogenomics Databa      | 23093600          |
| CTD                                      | Genes regulated by Vitamin D (Calcitriol) from the Comparative Toxic   | 23093600          |
| CTD                                      | Genes upregulated by Dihydrotestosterone (DHT) from the Comparativ     | 23093600          |
| CTD                                      | Genes upregulated by Doxorubicin from the Comparative Toxicogenom      | 23093600          |
| CTD                                      | Genes upregulated by estrogen from the Comparative Toxicogenomics      | 23093600          |
| CTD                                      | Genes upregulated by retinoic acid from the Comparative Toxicogenom    | 23093600          |
| CTD                                      | Genes upregulated by Tamoxifen from the Comparative Toxicogenomic      | 23093600          |
| CTD                                      | Genes upregulated by TSA from the Comparative Toxicogenomics Data      | 23093600          |
| CTD                                      | Genes upregulated by Vitamin D (Calcitriol) from the Comparative Toxic | 23093600          |
| E2F ChIP-chip                            | E2F regions 1.5kb TSS MCF7                                             | 17908821          |
| Erg ChIPseq                              | Erg regions within 50kb of a gene in HPC-7 cells                       | 20887958          |
| ESR1                                     | Estrogen targets                                                       | 15001666 17986456 |
| ESR1                                     | Known ERE                                                              | 17986456          |
| Fli-1 ChIPseq                            | Fli-1 regions within 50kb of a gene in HPC-7 cells                     | 20887958          |
| Gata2 ChIPseq                            | Gata2 regions within 50kb of a gene in HPC-7 cells                     | 20887958          |
| Gfi1b ChIPseq                            | Gfi1b regions within 50kb of a gene in HPC-7 cells                     | 20887958          |
| Lmo2 ChIPseq                             | Lmo2 regions within 50kb of a gene in HPC-7 cells                      | 20887958          |
| Lyl1 ChIPseq                             | Lyl1 regions within 50kb of a gene in HPC-7 cells                      | 20887958          |
| Meis1 ChIPseq                            | Meis1 regions within 50kb of a gene in HPC-7 cells                     | 20887958          |
| MISTIC peak                              | TCGA-BRCA Cell cycle                                                   |                   |
| MISTIC peak                              | TCGA-BRCA EGR/FOS normal                                               |                   |
| MISTIC peak                              | TCGA-BRCA FOXO1 Triple negative                                        |                   |
| MISTIC peak                              | TCGA-BRCA GRHL2 normal                                                 |                   |
| MISTIC peak                              | TCGA-BRCA ZEB1 normal                                                  |                   |
| Pu.1 ChIPseq                             | Pu.1 regions within 50kb of a gene in HPC-7 cells                      | 20887958          |
| RAR (RARa, RARb or RARg)                 | Known RARE                                                             | 16081280          |
| RAR (RARa, RARb or RARg)                 | Retinoic acid targets                                                  | 12401878          |
| Runx1 ChIPseq                            | Runx1 regions within 50kb of a gene in HPC-7 cells                     | 20887958          |
| Scl ChIPseq                              | Scl regions within 50kb of a gene in HPC-7 cells                       | 20887958          |
| Transcriptional Regulatory E AP1 targets |                                                                        | 17202159          |
| Transcriptional Regulatory E AP2 targets |                                                                        | 17202159          |
| Transcriptional Regulatory E E2F targets |                                                                        | 17202159          |
| Transcriptional Regulatory E EGR targets |                                                                        | 17202159          |
| bimodal genes                            | TCGA-BRCA tumor Bimodality Index >1.5                                  |                   |
| bimodal genes                            | TCGA-BRCA tumor Bimodality Index >1.2                                  |                   |



Supplementary Table 5: Genes in the CC cluster containing regions associated with E2F1, Mybl2 or FOXM1

| E2F1 HeLa 5 kb (ChIPSeq #157) | Mybl2 HepG2 5 kb (ChIPSeq #147) | FOXM1 MCF7 cells 5 kb (ChIP-Seq #120) | # TFs associated with 5kb flanking regions |
|-------------------------------|---------------------------------|---------------------------------------|--------------------------------------------|
| ANLN                          | ANLN                            | ANLN                                  | 3                                          |
| ASF1B                         | ASF1B                           | ASF1B                                 | 3                                          |
|                               | ASPM                            | ASPM                                  | 2                                          |
| ATAD2                         | ATAD2                           | ATAD2                                 | 3                                          |
| AURKA                         | AURKA                           | AURKA                                 | 3                                          |
|                               | AURKB                           | AURKB                                 | 2                                          |
|                               | BIRC5                           | BIRC5                                 | 2                                          |
| BLM                           | BLM                             |                                       | 2                                          |
|                               | BUB1                            |                                       | 1                                          |
| BUB1B                         | BUB1B                           |                                       | 2                                          |
|                               | BUB1B                           |                                       | 2                                          |
|                               | C15orf23                        | C15orf23                              | 2                                          |
|                               | C15orf42                        | C15orf42                              | 2                                          |
| C17orf53                      | C17orf53                        |                                       | 2                                          |
| C1orf135                      | C1orf135                        |                                       | 2                                          |
|                               | CASC5                           |                                       | 1                                          |
|                               | CCNA2                           | CCNA2                                 | 2                                          |
|                               | CCNB1                           | CCNB1                                 | 2                                          |
|                               | CCNB2                           | CCNB2                                 | 2                                          |
|                               | CDC20                           |                                       | 2                                          |
| CDC25A                        | CDC25A                          |                                       | 2                                          |
|                               | CDC25C                          | CDC25C                                | 2                                          |
|                               | CDC45                           |                                       | 2                                          |
| CDC45                         | CDC45                           |                                       | 2                                          |
| CDC6                          | CDC6                            |                                       | 2                                          |
| CDC42                         | CDC42                           | CDC42                                 | 2                                          |
|                               | CDC43                           |                                       | 1                                          |
|                               | CDC45                           |                                       | 1                                          |
| CDC48                         | CDC48                           | CDC48                                 | 3                                          |
| CDK1                          | CDK1                            | CDK1                                  | 3                                          |
|                               | CDKN3                           | CDKN3                                 | 2                                          |
|                               | CENPA                           | CENPA                                 | 2                                          |
|                               | CENPE                           |                                       | 1                                          |
| CENPF                         | CENPF                           | CENPF                                 | 3                                          |
| CENPI                         | CENPI                           |                                       | 2                                          |
| CENPL                         | CENPL                           | CENPL                                 | 3                                          |
| CENPM                         | CENPM                           |                                       | 2                                          |
|                               | CENPN                           |                                       | 1                                          |
|                               | CENPW                           |                                       | 1                                          |
| CEP55                         | CEP55                           | CEP55                                 | 2                                          |
|                               | CIT                             |                                       | 2                                          |
|                               | CKAP2L                          | CKAP2L                                | 2                                          |
|                               | CKS2                            | CKS2                                  | 2                                          |
| CLSPN                         |                                 |                                       | 1                                          |
|                               | CMC2                            |                                       | 1                                          |
|                               | DEPDC1                          | DEPDC1                                | 2                                          |
| DEPDC1B                       | DEPDC1B                         | DEPDC1B                               | 2                                          |
|                               | DLGAP5                          | DLGAP5                                | 2                                          |
| DSCC1                         |                                 |                                       | 1                                          |
| DTL                           | DTL                             |                                       | 2                                          |
| E2F1                          | E2F1                            |                                       | 2                                          |
| E2F2                          |                                 |                                       | 1                                          |
| E2F8                          | E2F8                            |                                       | 2                                          |
|                               | ECT2                            | ECT2                                  | 2                                          |
| ESCO2                         | ESCO2                           |                                       | 2                                          |
|                               | ESPL1                           | ESPL1                                 | 2                                          |
| EXO1                          | EXO1                            |                                       | 2                                          |
| EZH2                          | EZH2                            | EZH2                                  | 3                                          |
|                               | FAM54A                          | FAM54A                                | 2                                          |
|                               | FAM64A                          | FAM64A                                | 1                                          |
|                               | FAM83D                          | FAM83D                                | 2                                          |
| FANCA                         | FANCA                           |                                       | 2                                          |
| FANCB                         |                                 |                                       | 1                                          |
| FANCI                         |                                 | FANCI                                 | 2                                          |
| FBXO5                         | FBXO5                           | FBXO5                                 | 3                                          |
| FEN1                          | FEN1                            |                                       | 2                                          |
| FOXM1                         | FOXM1                           |                                       | 2                                          |
|                               | GAS2L3                          | GAS2L3                                | 2                                          |
| GINS1                         | GINS1                           |                                       | 2                                          |
| GTSE1                         | GTSE1                           | GTSE1                                 | 3                                          |
| H2AF2                         | H2AF2                           |                                       | 2                                          |
| HELLS                         |                                 |                                       | 1                                          |
| HJURP                         | HJURP                           | HJURP                                 | 3                                          |
|                               | HMMR                            | HMMR                                  | 2                                          |
|                               | IGGAP3                          |                                       | 1                                          |
|                               | KIAA1524                        | KIAA1524                              | 2                                          |
| KIF11                         | KIF11                           | KIF11                                 | 3                                          |
|                               | KIF14                           | KIF14                                 | 3                                          |
| KIF15                         | KIF15                           | KIF15                                 | 2                                          |
| KIF18A                        | KIF18A                          | KIF18A                                | 3                                          |
| KIF18B                        | KIF18B                          | KIF18B                                | 3                                          |
|                               | KIF20A                          | KIF20A                                | 2                                          |
|                               | KIF20B                          | KIF20B                                | 2                                          |
| KIF23                         | KIF23                           | KIF23                                 | 3                                          |
| KIF2C                         | KIF2C                           | KIF2C                                 | 3                                          |
| KIF4A                         | KIF4A                           | KIF4A                                 | 2                                          |
| KIFC1                         | KIFC1                           | KIFC1                                 | 3                                          |
| KNTC1                         | KNTC1                           |                                       | 2                                          |
|                               | KPNAB2                          | KPNAB2                                | 2                                          |
| LMNB1                         | LMNB1                           | LMNB1                                 | 3                                          |
| MAD2L1                        | MAD2L1                          | MAD2L1                                | 3                                          |
| MCM2                          |                                 |                                       | 1                                          |
| MCM6                          |                                 | MCM10                                 | 1                                          |
| MELK                          | MELK                            |                                       | 2                                          |
| MK167                         | MK167                           | MK167                                 | 3                                          |
|                               | MTBP                            |                                       | 1                                          |
| MND1                          |                                 |                                       | 1                                          |
| MYBL2                         |                                 |                                       | 1                                          |
| NCAPD2                        | NCAPD2                          | NCAPD2                                | 3                                          |
| NCAPG                         | NCAPG                           |                                       | 2                                          |
| NCAPG2                        | NCAPG2                          | NCAPG2                                | 3                                          |
| NCAPH                         | NCAPH                           | NCAPH                                 | 3                                          |
| NCAPH1                        |                                 |                                       | 3                                          |
| NDC80                         | NDC80                           | NDC80                                 | 3                                          |
|                               | NEIL3                           | NEIL3                                 | 2                                          |
|                               | NEK2                            | NEK2                                  | 2                                          |
| NUF2                          | NUF2                            | NUF2                                  | 3                                          |
| NUSAP1                        | NUSAP1                          | NUSAP1                                | 3                                          |
| OIP5                          | OIP5                            | OIP5                                  | 3                                          |
|                               | ORC1                            |                                       | 1                                          |
|                               | PARBPB                          | PARBPB                                | 2                                          |
| PBK                           | PBK                             | PBK                                   | 3                                          |
|                               | PLK1                            | PLK1                                  | 2                                          |
| PLK4                          | PLK4                            |                                       | 2                                          |
|                               | POLQ                            |                                       | 1                                          |
| PRC1                          | PRC1                            | PRC1                                  | 3                                          |
| PRR11                         | PRR11                           | PRR11                                 | 3                                          |
|                               | PTTG1                           | PTTG1                                 | 2                                          |
| RACGAP1                       | RACGAP1                         | RACGAP1                               | 3                                          |
| RAD51                         |                                 |                                       | 1                                          |
|                               | RAD51AP1                        |                                       | 1                                          |
| RAD54L                        | RAD54L                          |                                       | 2                                          |
| RANBP1                        | RANBP1                          |                                       | 2                                          |
| RNA5EH2A                      | RNA5EH2A                        |                                       | 2                                          |
| RRM2                          | RRM2                            | RRM2                                  | 3                                          |
|                               | SGOL1                           | SGOL1                                 | 2                                          |
|                               | SGOL2                           | SGOL2                                 | 2                                          |
|                               | SHCBP1                          |                                       | 1                                          |
| SKA3                          | SKA3                            | SKA3                                  | 3                                          |
| SPAG5                         | SPAG5                           | SPAG5                                 | 3                                          |
|                               | SPC24                           | SPC24                                 | 2                                          |
| STIL                          | STIL                            | STIL                                  | 3                                          |
| STMN1                         | STMN1                           |                                       | 2                                          |
|                               | TACC3                           | TACC3                                 | 2                                          |
| TCF19                         | TCF19                           |                                       | 2                                          |
| TIMELESS                      |                                 |                                       | 1                                          |
|                               | TK1                             |                                       | 1                                          |
| TMPO                          | TMPO                            | TMPO                                  | 3                                          |
|                               | TOP2A                           | TOP2A                                 | 2                                          |
|                               | TPX2                            | TPX2                                  | 2                                          |
|                               | TRDAP                           |                                       | 2                                          |
|                               | TTK                             | TTK                                   | 2                                          |
| TYMS                          | TYMS                            |                                       | 2                                          |
|                               | UBE2C                           | UBE2C                                 | 2                                          |
| UBE2T                         | UBE2T                           | UBE2T                                 | 3                                          |
| UHRF1                         | UHRF1                           | UHRF1                                 | 3                                          |
| ZNF367                        |                                 |                                       | 2                                          |
| ZWINT                         | ZWINT                           |                                       | 2                                          |

**Supplementary Table 6: Genes with chromatin regions associated with TFs in the FOXA1/ESR1 cluster**

| Gene      | Subcluster | ChIPSeq ER 10kb | ChIPSeq FOXA1 10 kb | ChIPSeq GATA3 10 kb | ChIPSeq SPDEF 5kb | ChIPSeq AR 10 kb |
|-----------|------------|-----------------|---------------------|---------------------|-------------------|------------------|
| ABCC8     |            |                 | ABCC8               |                     | ABCC8             |                  |
| AFF3      |            | AFF3            |                     |                     | AFF3              | AFF3             |
| AGR2      | FOXA1      | AGR2            | AGR2                | AGR2                |                   | AGR2             |
| AGR3      | ESR1       | AGR3            | AGR3                | AGR3                |                   | AGR3             |
| ANXA9     |            |                 | ANXA9               | ANXA9               | ANXA9             |                  |
| APBB2     |            | ANXA9           |                     | APBB2               | APBB2             | APBB2            |
| AR        |            |                 | AR                  | AR                  | AR                | AR               |
| ARSG      |            | ARSG            | ARSG                |                     | ARSG              | ARSG             |
| C17orf28  |            | C17orf28        | C17orf28            |                     | C17orf28          | C17orf28         |
| C1orf64   |            | C1orf64         |                     |                     |                   |                  |
| C6orf211  |            |                 | C6orf211            |                     | C6orf211          |                  |
| C9orf152  |            | C9orf152        | C9orf152            | C9orf152            | C9orf152          | C9orf152         |
| CA12      | ESR1       | CA12            | CA12                | CA12                | CA12              |                  |
| CCDC170   | ESR1       | CCDC170         | CCDC170             | CCDC170             | CCDC170           |                  |
| CMBL      |            | CMBL            | CMBL                |                     | CMBL              | CMBL             |
| CT62      | ESR1       | CT62            | CT62                |                     | CT62              | CT62             |
| DACH1     |            |                 |                     |                     |                   |                  |
| DEGS2     |            | DEGS2           |                     | DEGS2               | DEGS2             | DEGS2            |
| DNALI1    |            |                 |                     |                     |                   | DNALI1           |
| ESR1      | ESR1       | ESR1            | ESR1                | ESR1                | ESR1              | ESR1             |
| FAM63A    |            | FAM63A          | FAM63A              |                     | FAM63A            | FAM63A           |
| FBP1      |            | FBP1            |                     | FBP1                | FBP1              | FBP1             |
| FLJ45983  | ESR1       | FLJ45983        | FLJ45983            | FLJ45983            | FLJ45983          |                  |
| FOXA1     | FOXA1      | FOXA1           | FOXA1               | FOXA1               | FOXA1             | FOXA1            |
| FSIP1     |            | FSIP1           | FSIP1               | FSIP1               | FSIP1             | FSIP1            |
| GATA3     | ESR1       | GATA3           | GATA3               | GATA3               | GATA3             |                  |
| GPR160    |            | GPR160          | GPR160              | GPR160              | GPR160            | GPR160           |
| GPR77     | ESR1       | GPR77           |                     | GPR77               | GPR77             |                  |
| KCNJ11    |            |                 | KCNJ11              |                     | KCNJ11            |                  |
| LOC145837 | FOXA1      | LOC145837       | LOC145837           | LOC145837           | LOC145837         | LOC145837        |
| MLPH      | FOXA1      | MLPH            | MLPH                | MLPH                | MLPH              | MLPH             |
| PRR15     | FOXA1      | PRR15           |                     |                     | PRR15             | PRR15            |
| RAB17     |            | RAB17           |                     |                     | RAB17             | RAB17            |
| RABEP1    |            | RABEP1          |                     |                     | RABEP1            |                  |
| RMND1     |            |                 | RMND1               |                     | RMND1             |                  |
| SIDT1     |            | SIDT1           | SIDT1               | SIDT1               |                   | SIDT1            |
| SLC16A6   |            | SLC16A6         | SLC16A6             |                     | SLC16A6           | SLC16A6          |
| SLC44A4   |            | SLC44A4         |                     |                     | SLC44A4           |                  |
| SLC7A8    |            | SLC7A8          | SLC7A8              | SLC7A8              | SLC7A8            | SLC7A8           |
| SPDEF     | FOXA1      | SPDEF           | SPDEF               | SPDEF               | SPDEF             | SPDEF            |
| TBC1D9    | ESR1       | TBC1D9          |                     |                     | TBC1D9            |                  |
| TFF1      | FOXA1      | TFF1            | TFF1                | TFF1                | TFF1              | TFF1             |
| TFF3      | FOXA1      | TFF3            | TFF3                | TFF3                | TFF3              | TFF3             |
| THSD4     | ESR1       |                 |                     |                     |                   | THSD4            |
| XBP1      | FOXA1      | XBP1            | XBP1                | XBP1                | XBP1              | XBP1             |

**Supplementary Table 7: Enrichment in basal genesets in the p63 cluster**

| P-value  | Odds   | Name                                                                                              | Type        | Cat                                | ID     |
|----------|--------|---------------------------------------------------------------------------------------------------|-------------|------------------------------------|--------|
| 8.32E-28 | 182.32 | module #2 Dev/Basal: development/differentiation                                                  | microarrays | Breast Cancer Co-Expression module | 48     |
| 2.25E-22 | 77.16  | SMID_BREAST_CANCER_BASAL_UP                                                                       | msigdb      | C2/CGP                             | M8124  |
| 1.41E-17 | 57.66  | CHARAFE_BREAST_CANCER_LUMINAL_VS_BASAL_DN                                                         | msigdb      | C2/CGP                             | M14507 |
| 7.63E-16 | 224.15 | Breast_Huper07_66genes_BasalCells                                                                 | GeneSigDB   | Breast                             | 2535   |
| 1.05E-15 | 214.39 | HUPER_BREAST_BASAL_VS_LUMINAL_UP                                                                  | msigdb      | C2/CGP                             | M13422 |
| 8.67E-13 | 87.01  | CHARAFE_BREAST_CANCER_BASAL_VS_MESENCHYMAL_UP                                                     | msigdb      | C2/CGP                             | M12795 |
| 1.56E-09 | 12.11  | Breast_Farmer05_3198genes_basal_apocrine_luminal                                                  | GeneSigDB   | Breast                             | 1241   |
| 5.81E-09 | 101.57 | Breast_Blick10_57genes_CD24_BasalB                                                                | GeneSigDB   | Breast                             | 1230   |
| 1.82E-06 | 20.29  | FARMER_BREAST_CANCER_BASAL_VS_LULMINAL                                                            | msigdb      | C2/CGP                             | M5652  |
| 3.54E-05 | 16.05  | FARMER_BREAST_CANCER_APOCRINE_VS_BASAL                                                            | msigdb      | C2/CGP                             | M2631  |
| 3.62E-05 | 6.11   | Breast_Kreike07_3712genes_Basal_mets                                                              | GeneSigDB   | Breast                             | 3362   |
| 3.56E-04 | 84.14  | Breast_Blick10_35genes_CD24_BasalB                                                                | GeneSigDB   | Breast                             | 1048   |
| 2.33E-03 | 889.36 | squamous basal epithelial stem cell differentiation involved in prostate gland acinus development | go          | BP                                 | 60529  |
| 3.21E-03 | 11.33  | Breast_Farmer05_269genes__basal_apocrine_luminal                                                  | GeneSigDB   | Breast                             | 690    |

**Supplementary Table 8: enrichment in basal genesets in the FOXC1 cluster.**

| P-value  | Odds   | Name                                             | Type        | Cat                                | ID     |
|----------|--------|--------------------------------------------------|-------------|------------------------------------|--------|
| 6.34E-13 | 323.74 | module #2 Dev/Basal: development/differentiation | microarrays | Breast Cancer Co-Expression module | 48     |
| 5.87E-10 | 118    | SMID_BREAST_CANCER_BASAL_UP                      | msigdb      | C2/CGP                             | M8124  |
| 2.46E-04 | 111.25 | HUPER_BREAST_BASAL_VS_LUMINAL_DN                 | msigdb      | C2/CGP                             | M5505  |
| 2.54E-04 | 33.52  | FARMER_BREAST_CANCER_BASAL_VS_LULMINAL           | msigdb      | C2/CGP                             | M5652  |
| 3.59E-04 | 12.78  | Breast_Farmer05_3198genes_basal_apocrine_luminal | GeneSigDB   | Breast                             | 1241   |
| 4.50E-03 | 24.74  | Breast_Farmer05_269genes__basal_apocrine_luminal | GeneSigDB   | Breast                             | 690    |
| 7.36E-03 | 19.1   | FARMER_BREAST_CANCER_APOCRINE_VS_BASAL           | msigdb      | C2/CGP                             | M2631  |
| 1.08E-02 | 6.65   | Breast_Kreike07_3712genes_Basal_mets             | GeneSigDB   | Breast                             | 3362   |
| 1.36E-02 | 13.75  | CHARAFE_BREAST_CANCER_LUMINAL_VS_BASAL_DN        | msigdb      | C2/CGP                             | M14507 |
| 2.00E-02 | 56.64  | CHARAFE_BREAST_CANCER_BASAL_VS_MESENCHYMAL_DN    | msigdb      | C2/CGP                             | M12895 |
| 2.08E-02 | 54.41  | Breast_Sorlie06_54genes_Luminal_v_Basal          | GeneSigDB   | Breast                             | 3126   |
